# Supplementary material for: Enantiocomplementary C–H bond hydroxylation through a dual-enzyme catalyzed one-pot two-step process
Source: Royal Society of Chemistry journal article supplement (doi:10.1039/d4nj02444c), 2024-01-01
Supplement: d4nj02444c1.pdf [file d4nj02444c1.pdf]

# Enantiocomplementary C–H Bond Hydroxylation through a Dual-Enzyme Catalyzed One-pot Two-step Process

Jian Xu, Pan Ma and Qing-song Chen

## Supporting Information

### 1. General information

Unless otherwise noted, all starting materials and reagents were obtained from commercial suppliers and used without further purification. Horseradish peroxidase was purchased from Macklin (Shanghai, China). <sup>1</sup>H NMR spectra were recorded in CDCl<sub>3</sub> operating at 400 MHz. Proton chemical shifts are reported relative to the residual proton signals of the deuterated solvent CDCl<sub>3</sub> (7.26 ppm) or TMS. Proton coupling patterns were described as singlet (s), doublet (d), triplet (t), quartet (q), and multiple (m).

### 2. General procedure for the expression of carbonyl reductases

The cells were initially grown in 5 mL of LB medium supplemented with 50 µg/mL kanamycin at 37 °C and 220 rpm overnight. Afterwards, a 1% (v/v) seed culture was inoculated into TB medium with 50 µg/mL kanamycin at 37 °C and 220 rpm. Protein expression induction commenced upon reaching an OD<sub>600</sub> of 0.6, with the addition of 0.1 mM isopropyl β-D-1-thiogalactopyranoside (IPTG). Cultivation was sustained for 16 hours at 20 °C and 220 rpm. The cells were then harvested by centrifugation, followed by resuspension in a 50 mM sodium phosphate buffer at pH 8.0 for the *Lb*ADH and pH 6.5 for *Ras*ADH reactions.

### 3. Synthesis of racemic alcohols

General procedures were adapted from literatures, the ketone (2 mmol) was reacted with NaBH<sub>4</sub> (5 mmol) in methanol (10 mL) at room temperature. The mixture was stirred until the ketone was fully converted, confirmed by TLC. The crude product was evaporated, dissolved in dichloromethane, and washed with water. The organic phase was concentrated under reduced pressure and purified using flash column chromatography to obtain the desired racemic alcohols.

### 4. General procedure for the one-pot two-step enantioselectivity C–H bond hydroxylation reaction

In a 25 mL flask with a magnetic stir bar, 200 µL of DMSO containing alkylarene **1** (0.01 mmol) and NHPI (0.01 mmol) were mixed. Next, 1.8 mL of 50 mM PBS buffer at pH 5.5 was added. Subsequently, 0.1 mmol H<sub>2</sub>O<sub>2</sub> was slowly introduced. The reaction was carried out with the addition of an air balloon

and allowed to react at room temperature for 8-10 hour. If alcohol was produced as a byproduct, the addition of HRP could be continued to promote further reaction (monitored by thin-layer chromatography (TLC) or gas chromatography (GC)). Following this, whole-cell culture of carbonyl reductase (10 mL, with glucose 0.2 mmol) was introduced to the mixture, continuing the reaction overnight. The reaction was extracted three times with ethyl acetate. The stereochemistry and yield were evaluated using HPLC.

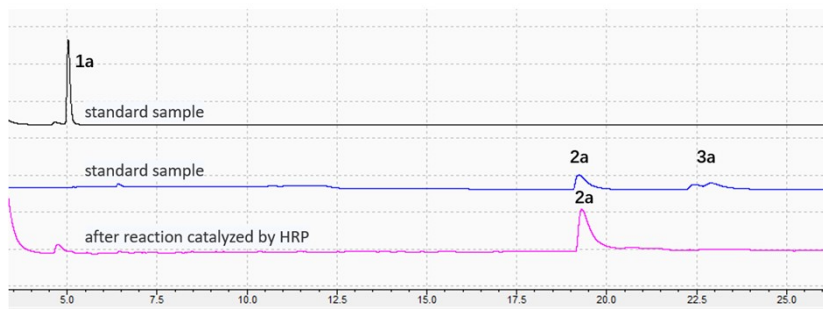

Figure S1. GC trace of HRP catalyzed oxidation

## 5. General procedure for the model reaction with purified *LbADH*

*LbADH* purification: The cells were subjected to three cycles of freezing and thawing before releasing the target proteins using sonication. The lysate was then clarified by centrifugation at 4000 rpm and 4°C for 30 minutes, and the resulting supernatant was applied to a 2 mL Ni-NTA agarose column. This column was washed with lysis buffer (100 mM PBS, pH 7.4, 500 mM NaCl, 5% glycerol) and eluted with five column volumes of elution buffer (100 mM PBS, pH 7.4, 500 mM NaCl, 5% glycerol, 50 mM imidazole). Finally, the collected fraction was desalted using ultrafiltration. The glucose dehydrogenase was purchased from Aladdin (Shanghai, China).

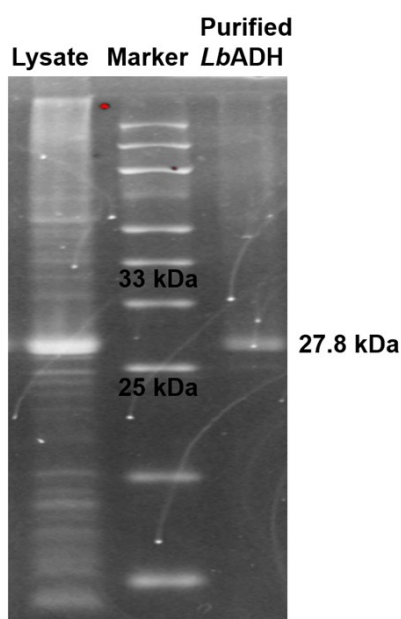

Reaction: In a 25 mL flask with a magnetic stir bar, 200  $\mu$ L of DMSO containing alkylarene **1** (0.01

mmol) and NHPI (0.01 mmol) were mixed. Next, 1.8 mL of 50 mM PBS buffer at pH 5.5 was added. Subsequently, 0.1 mmol H<sub>2</sub>O<sub>2</sub> was slowly introduced. The reaction was carried out with the addition of an air balloon and allowed to react at room temperature for 8-10 hour. Following this, purified *Lb*ADH (0.1 μm in 10 mL, with glucose dehydrogenase μm and 0.2 glucose 0.2 mmol) was introduced to the mixture, continuing the reaction overnight. The reaction was extracted three times with ethyl acetate. The stereochemistry and yield were evaluated using HPLC, to obtained (*R*)-3a in 20% yield and 90% ee.

## 6. Preparative scale reactions

In a 500 mL flask equipped with a magnetic stir bar, a mixture of 2 mL of DMSO containing alkylarene **1a** (0.1 mmol) and NHPI (0.1 mmol) was prepared. Following that, 18 mL of 50 mM PBS at pH 5.5 was added. Subsequently, 1.0 mmol H<sub>2</sub>O<sub>2</sub> was slowly introduced. The reaction system was supplemented with an air balloon and proceeded at room temperature for 12 hours. If alcohol was produced as a byproduct, the addition of HRP could be continued to promote further reaction. Following this, whole-cell culture of carbonyl reductase (100 mL with glucose 2 mmol) was added to the mixture, and the reaction was left overnight. The reaction mixture was then extracted three times with ethyl acetate, concentrated under reduced pressure, and the resulting crude mixture was purified by flash column chromatography on silica gel.

## 7. Procedure for the one-pot two-step deracemization process of *rac*-3a

In a 10 mL flask with a magnetic stir bar, 200 μL of DMSO containing alkylarene **3a** (0.01 mmol) and NHPI (0.01 mmol) were mixed. Next, 1.8 mL of 50 mM PBS buffer at pH 5.5 was added. Subsequently, 0.8 mmol H<sub>2</sub>O<sub>2</sub> was slowly introduced. The reaction was carried out with the addition of an air balloon and allowed to react at room temperature for about 6 hours. Following this, whole-cell culture carbonyl reductase (10 mL with glucose 0.2 mmol) was introduced to the mixture, continuing the reaction overnight. The reaction was extracted three times with ethyl acetate. The stereochemistry and yield were evaluated using chiral HPLC.

## 8. The protein sequence of carbonyl reductase.

*Ras*ADH

:

MGSSHHHHHSSGLVPRGSHMYRLLNKTAVITGGNSGIGLATAKRFVAEGAYVFIVGRRRKE  
LEQAAAEIGRNVTAVKADVTKLEDLDRLYAIVREQRGSIDVLFANSGAIEQKTLEEITPEHYDR  
TFDVNVRGLIFTVQKALPLLRDGGSVILTSSVAGVLGLQAHDYSAAKAAVRSLARTWTTELK  
GRSIRVNAVSPGAIDTPIIENQVSTQEEADELRAKFAAATPLGRVGRPEELAAAVLFLASDDSS  
YVAGIELFVDGGLTQV

*Lb*ADH:

MGHHHHHHGSGSNRLDGKVAIITGGTLGIGLAIATKFVEEGAKVMITGRHSDVGEKAAK  
SVGTPDQIQFFQHDSSEDEDGWTKLFDATEKAFGPVSTLVNNAAGIAVNKSVEETTTAEWR  
KLLAVNLDGVFFGTRLGIQRMKNKGLGASIIINMSSIEGFVGDPSLGAYNASKGAVRIMSK  
SAALDCALKDYDVRVNTVHPGYIKTPLVDDLPGAEEAMSQRKTTPMGHIGEPNDIAIYICV

Table S1 Optimize the concentration of hydrogen peroxide

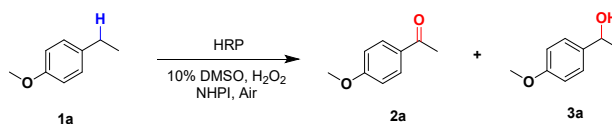

| Entry | Variations of the standard conditions  | Yield of <b>2a</b> (%) <sup>[b]</sup> |
|-------|----------------------------------------|---------------------------------------|
| 1     | 20 eq. H <sub>2</sub> O <sub>2</sub> . | 80                                    |
| 2     | 15 eq. H <sub>2</sub> O <sub>2</sub> . | 80                                    |
| 3     | 10 eq. H <sub>2</sub> O <sub>2</sub> . | 78                                    |
| 4     | 8 eq. H <sub>2</sub> O <sub>2</sub> .  | 61                                    |
| 5     | 5 eq. H <sub>2</sub> O <sub>2</sub> .  | 50                                    |
| 6     | 2 eq. H <sub>2</sub> O <sub>2</sub> .  | 15                                    |

[a] Reaction conditions: The total reaction volume is 2 mL (contain 1.8 mL 50 mM PBS buffer, pH 5.5, and 200  $\mu$ L DMSO), **1a** (0.01 mmol), NHPI (0.01 mmol) and H<sub>2</sub>O<sub>2</sub> under air. [b] Yields were determined by HPLC

Table S2 Investigating the effects of oxygen

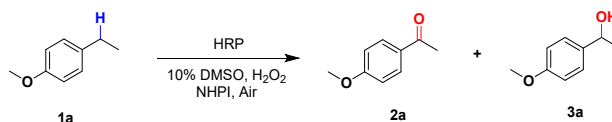

| Entry | Variations of the standard conditions | Yield of <b>2a</b> (%) <sup>[b]</sup> |
|-------|---------------------------------------|---------------------------------------|
| 1     | None                                  | 78                                    |
| 2     | pure oxygen instead of air            | 79                                    |
| 3     | without air                           | < 10                                  |

[a] Reaction conditions: The total reaction volume is 2 mL (contain 1.8 mL 50 mM PBS buffer, pH 5.5, and 200  $\mu$ L DMSO), **1a** (0.01 mmol), NHPI (0.01 mmol) and H<sub>2</sub>O<sub>2</sub> (0.1 mmol) under air. [b] Yields were determined by HPLC

NMR-Spectra (from racemic standards)

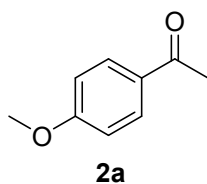

$^1\text{H}$  NMR (400 MHz,  $\text{CDCl}_3$ )  $\delta$  7.96-7.92 (m, 2H, ArH), 6.96-6.92 (m, 2H, ArH), 3.88-3.86 (s, 3H,  $\text{CH}_3$ ), 2.57-2.55 (s, 3H,  $\text{CH}_3$ ).

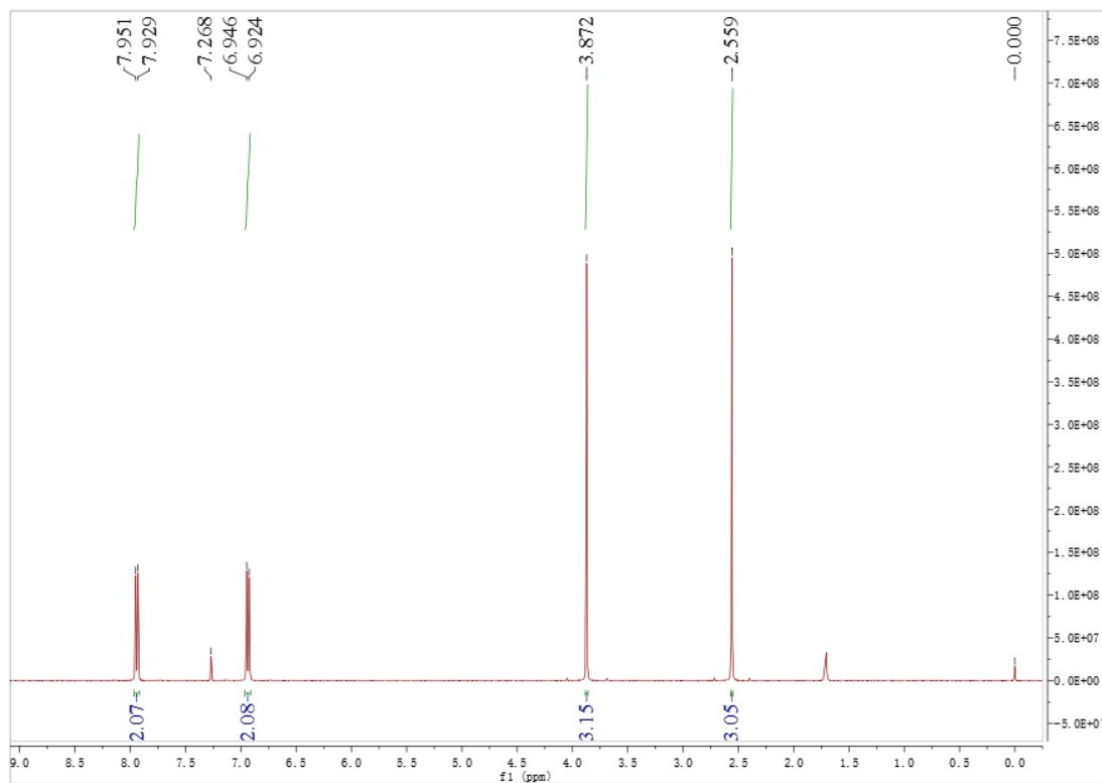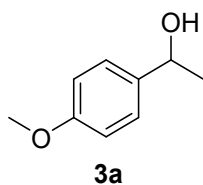

$^1\text{H}$  NMR (400 MHz,  $\text{CDCl}_3$ )  $\delta$  7.30 (d,  $J = 8.8$  Hz, 2H, ArH), 6.91-6.85 (m, 2H, ArH), 4.85 (q,  $J = 6.4$  Hz, 1H, CH), 3.80 (s, 3H,  $\text{CH}_3$ ), 1.86 (s, 1H, OH), 1.48 (d,  $J = 6.4$  Hz, 3H,  $\text{CH}_3$ ).

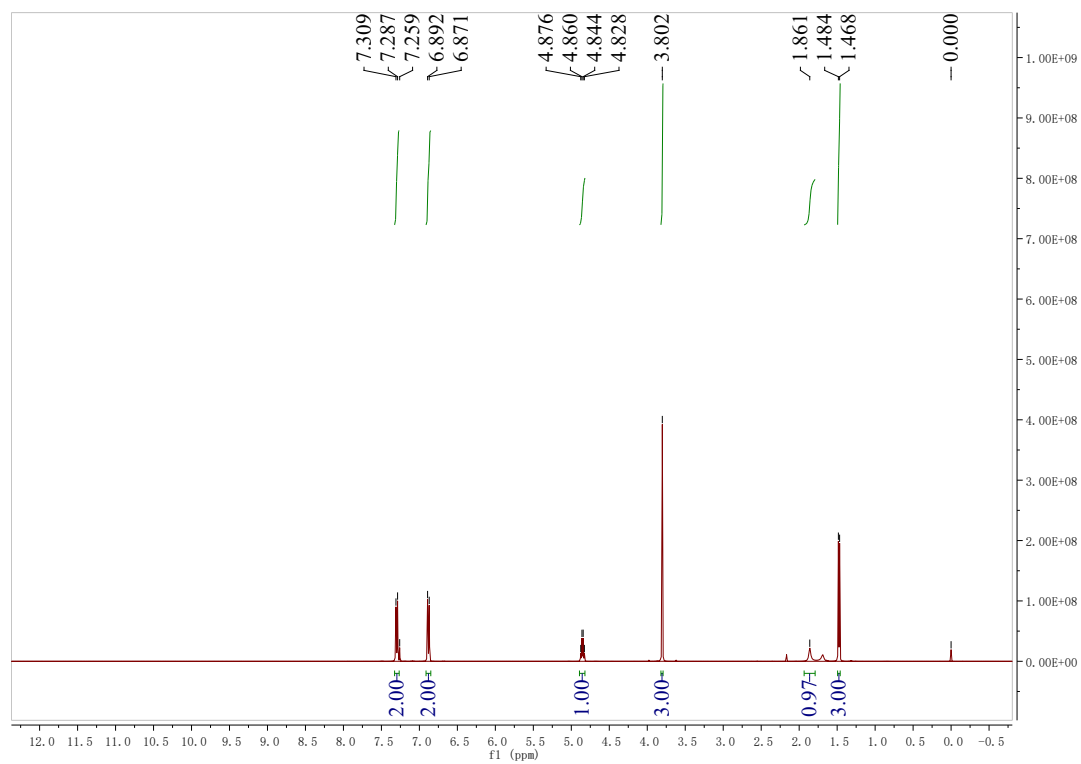

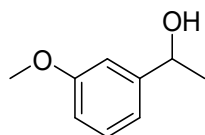

**3b**

$^1\text{H}$  NMR (400 MHz,  $\text{CDCl}_3$ )  $\delta$  7.29-7.23 (m, 1H, ArH), 6.99-6.88 (m, 2H, ArH), 6.87-6.76 (m, 1H, ArH), 4.87 (q,  $J = 6.4$  Hz, 1H, CH), 3.82 (s, 3H,  $\text{CH}_3$ ), 1.85 (s, 1H, OH), 1.49 (d,  $J = 6.8$  Hz, 3H,  $\text{CH}_3$ ).

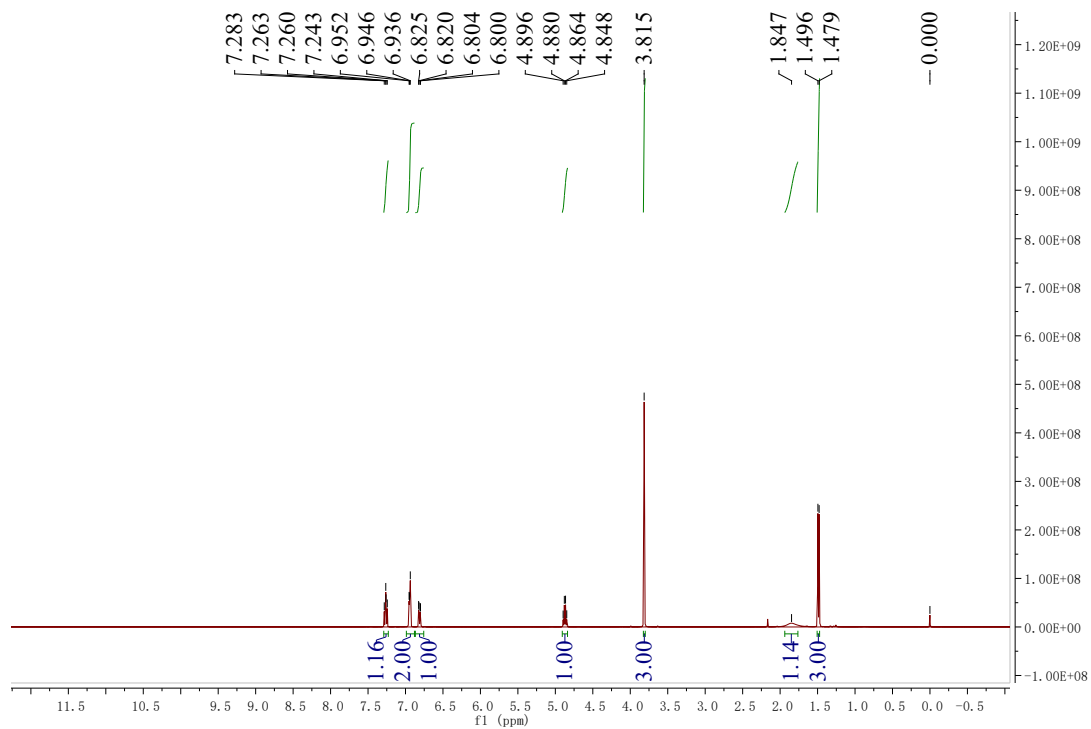

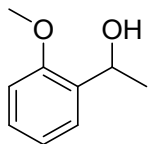

**3c**

$^1\text{H NMR}$  (400 MHz,  $\text{CDCl}_3$ )  $\delta$  7.34 (dd,  $J = 7.6, 1.2$  Hz, 1H, ArH), 7.25 (td,  $J = 8.0, 1.6$  Hz, 1H, ArH), 7.02-6.92 (m, 1H, ArH), 6.92-6.82 (m, 1H, ArH), 5.10 (q,  $J = 6.4$  Hz, 1H, CH), 3.87 (s, 3H,  $\text{CH}_3$ ), 2.66 (s, 1H, OH), 1.51 (d,  $J = 6.4$  Hz, 3H,  $\text{CH}_3$ ).

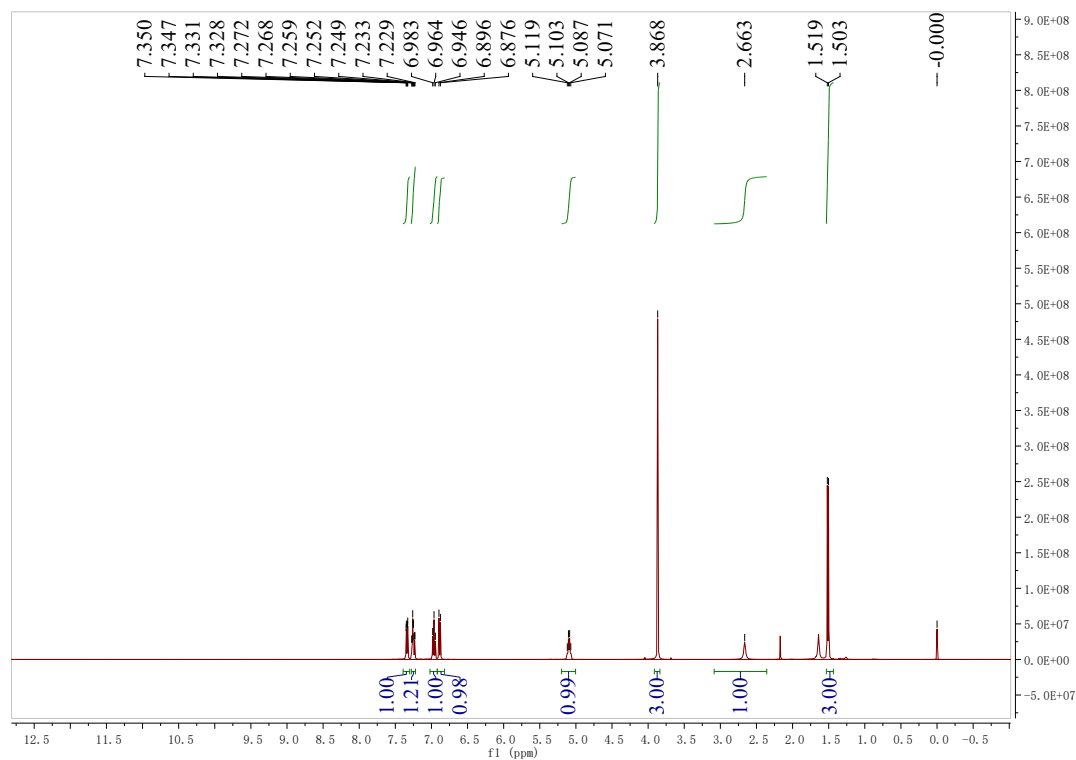



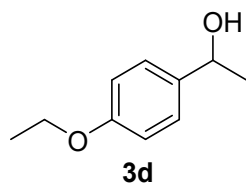

$^1\text{H}$  NMR (400 MHz,  $\text{CDCl}_3$ )  $\delta$  7.34-7.26 (m, 2H, ArH), 6.91-6.61 (m, 2H, ArH), 4.84 (q,  $J = 6.4$  Hz, 1H, CH), 4.02 (q,  $J = 7.2$  Hz, 2H,  $\text{CH}_2$ ), 1.87 (s, 1H, OH), 1.47 (d,  $J = 6.4$  Hz, 3H,  $\text{CH}_3$ ), 1.41 (t,  $J = 6.8$  Hz, 3H,  $\text{CH}_3$ ).

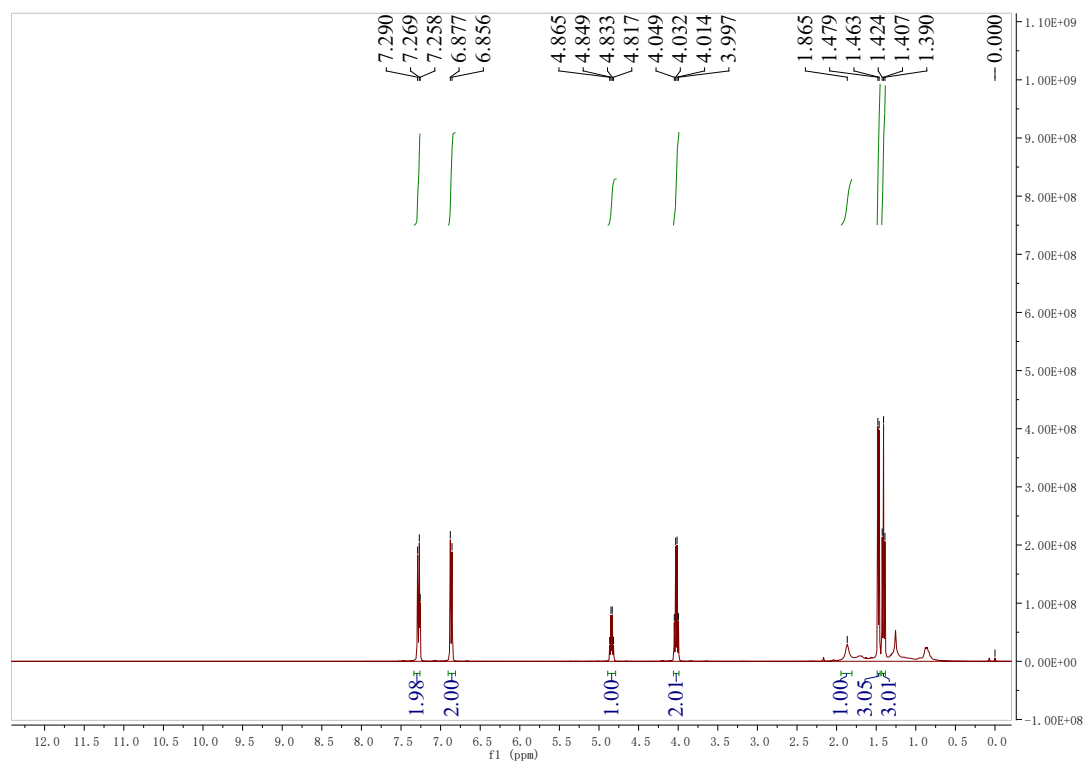

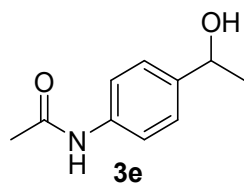

$^1\text{H}$  NMR (400 MHz,  $\text{CDCl}_3$ )  $\delta$  7.69 (s, 1H, OH), 7.46-7.40 (m, 2H, ArH), 7.30-7.26 (m, 2H, ArH), 5.30 (s, 1H, NH), 4.84 (q,  $J = 6.4$  Hz, 1H, CH), 2.13 (s, 3H,  $\text{CH}_3$ ), 1.46 (d,  $J=6.4$  Hz, 3H,  $\text{CH}_3$ ).

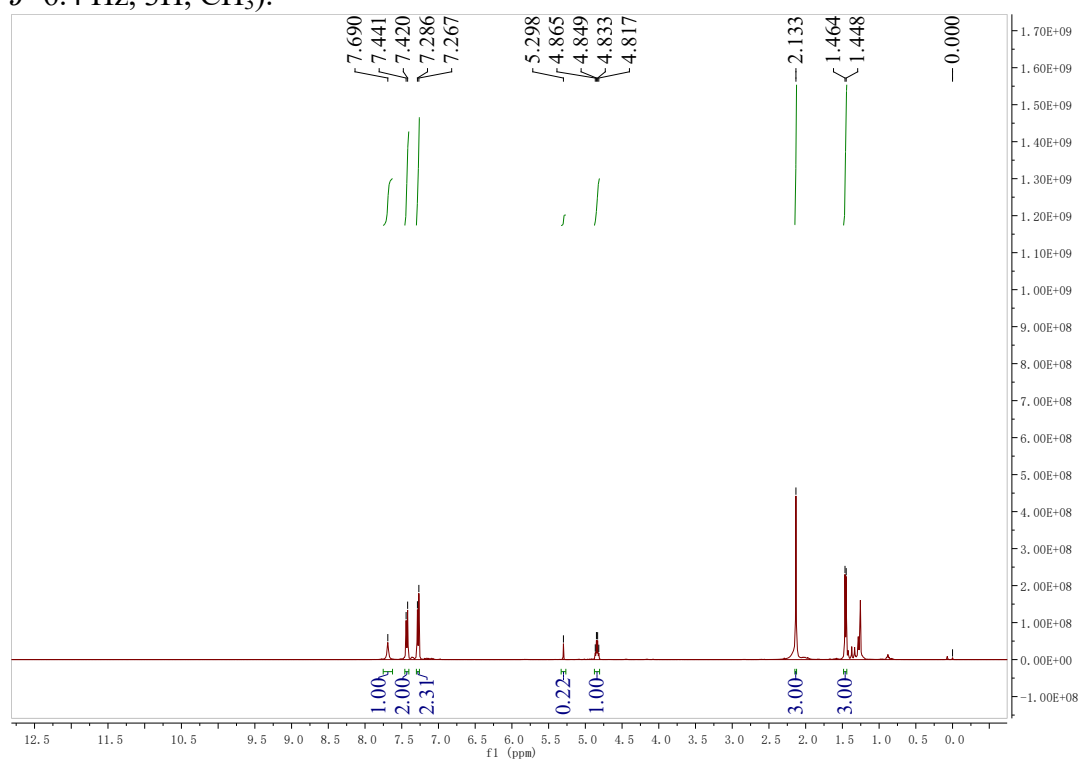

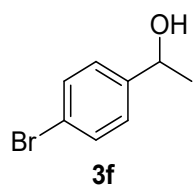

$^1\text{H}$  NMR (400 MHz,  $\text{CDCl}_3$ )  $\delta$  7.65-7.36 (m, 2H, ArH), 7.28-7.22 (m, 2H, ArH), 4.87 (q,  $J = 6.4$  Hz, 1H, CH), 1.90 (s, 1H, OH), 1.47 (d,  $J = 6.4$  Hz, 3H,  $\text{CH}_3$ ).

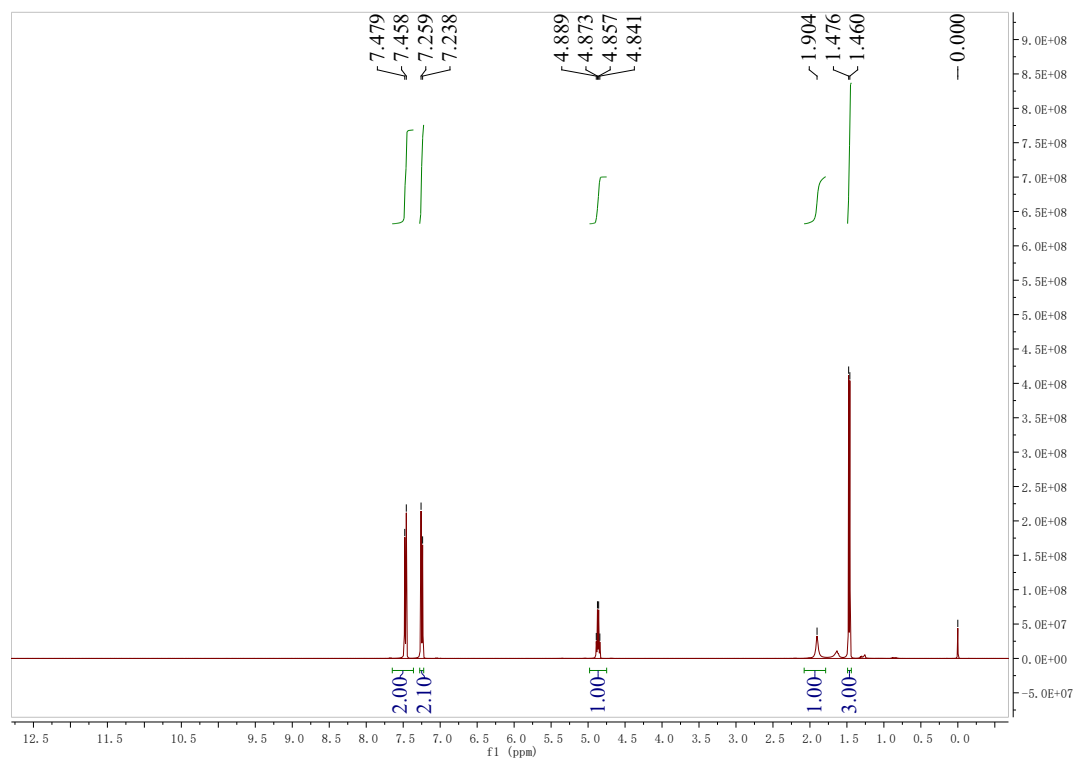

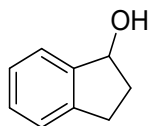

**3g**

$^1\text{H}$  NMR (400 MHz,  $\text{CDCl}_3$ )  $\delta$  7.45-7.39 (m, 1H, ArH), 7.29-7.21 (m, 2H, ArH), 5.24 (t,  $J = 6.4$  Hz, 1H, CH), 3.11-3.03 (m, 1H, one proton of  $\text{CH}_2$ ), 2.87-2.78 (m, 1H, one proton of  $\text{CH}_2$ ), 2.54-2.45 (m, 1H, one proton of  $\text{CH}_2$ ), 2.02-1.92 (m, 1H, one proton of  $\text{CH}_2$ ), 1.89 (s, 1H, OH).

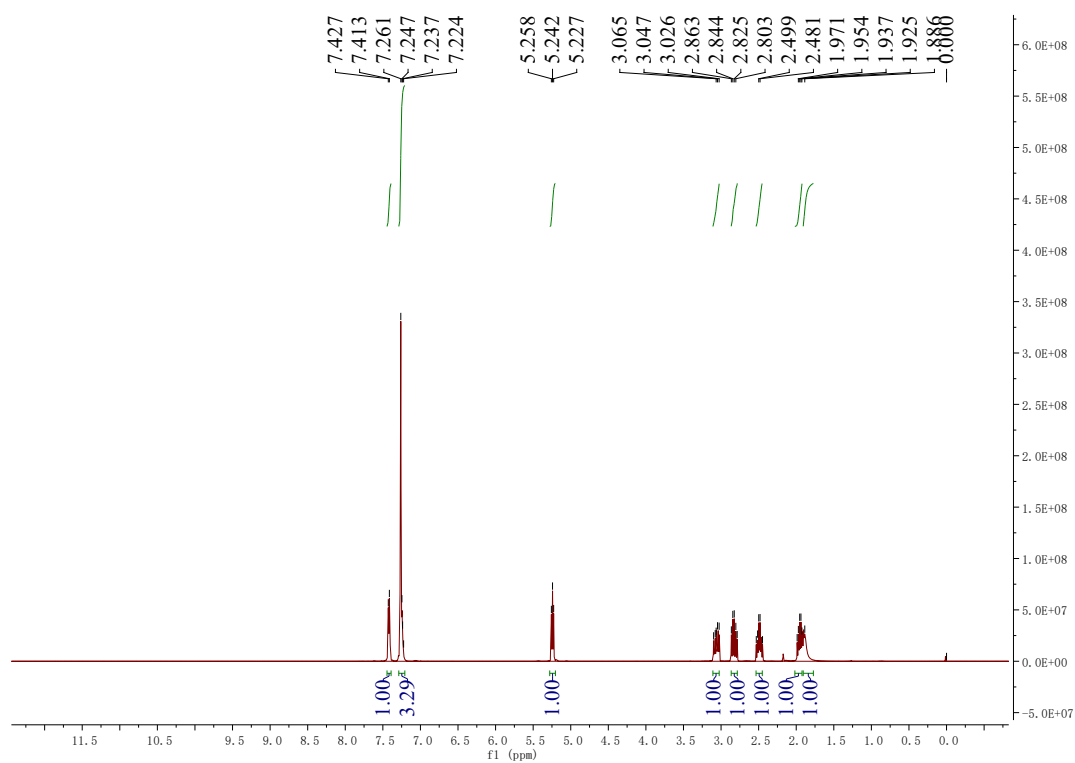

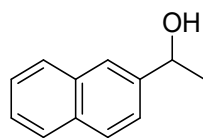

**3h**

$^1\text{H}$  NMR (400 MHz,  $\text{CDCl}_3$ )  $\delta$  7.88-7.77 (m, 4H, ArH), 7.58-7.41 (m, 3H, ArH), 5.06 (q,  $J = 6.4$  Hz, 1H, CH), 1.88 (s, 1H, OH), 1.57 (d,  $J = 6.4$  Hz, 3H,  $\text{CH}_3$ ).

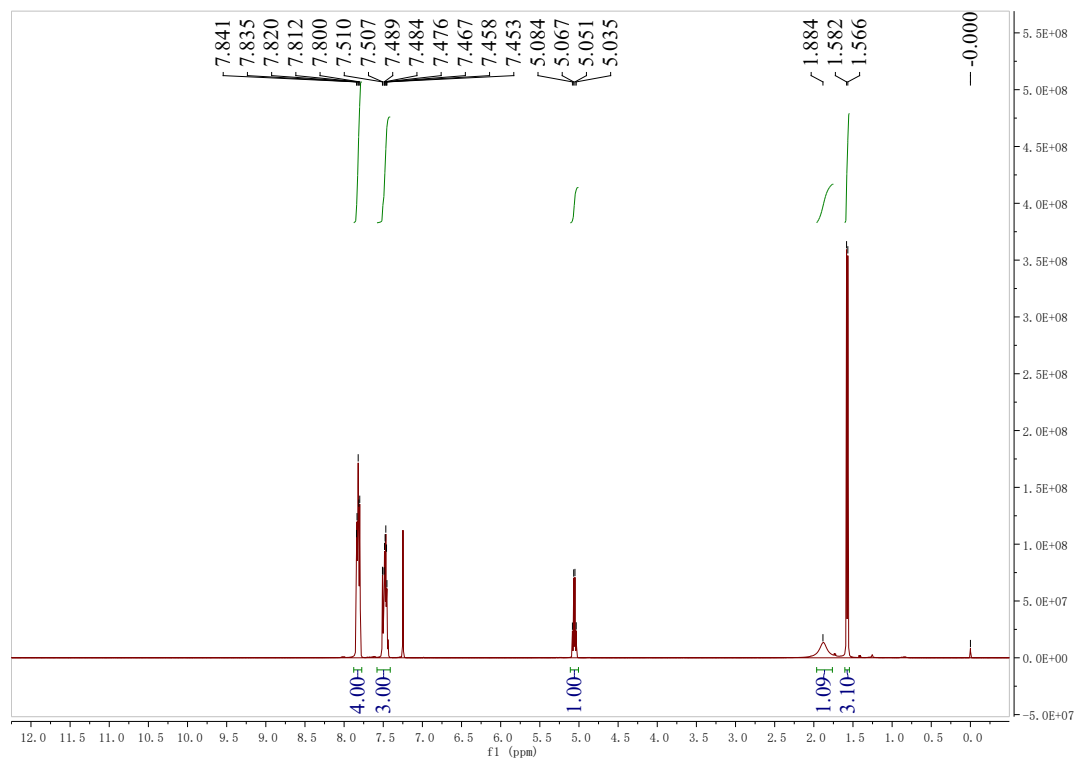

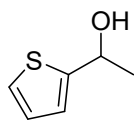

**3i**

$^1\text{H}$  NMR (400 MHz,  $\text{CDCl}_3$ )  $\delta$  7.26-7.22 (m, 1H, CH), 7.03-6.95 (m, 1H, CH), 5.18-5.10 (m, 1H, CH), 2.00 (d,  $J = 4.8$  Hz, 1H, OH), 1.61 (d,  $J = 6.4$  Hz, 3H,  $\text{CH}_3$ ).

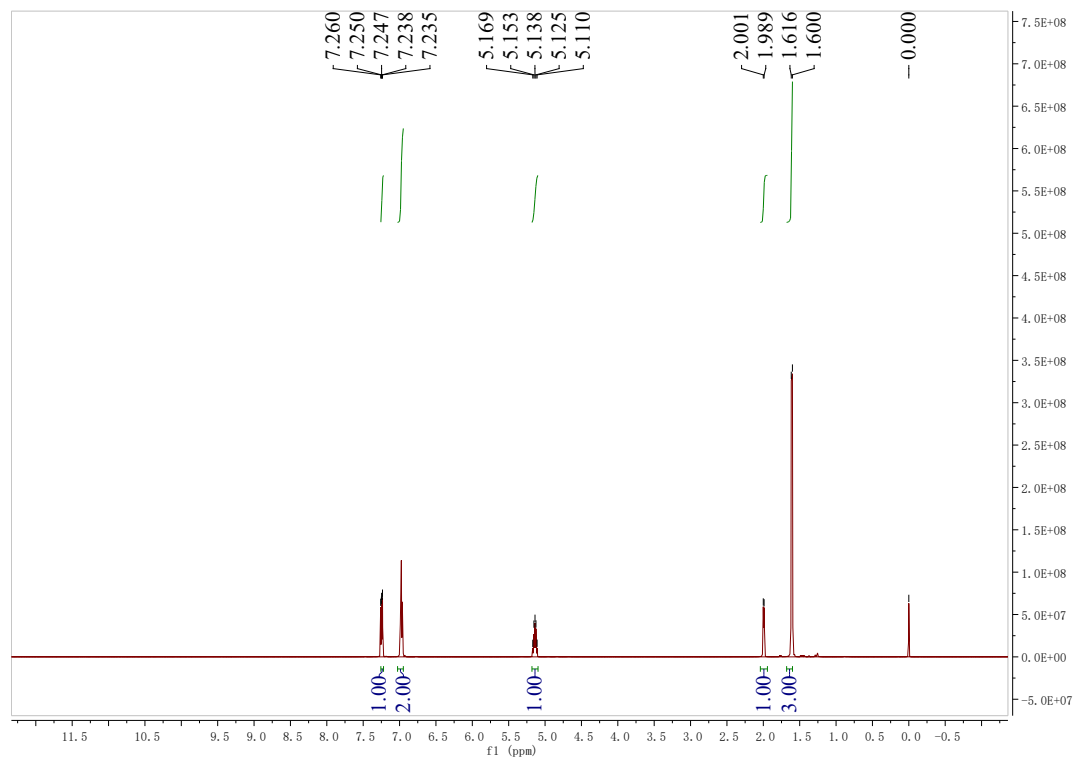

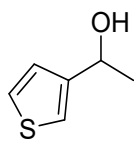

**3j**

$^1\text{H}$  NMR (400 MHz,  $\text{CDCl}_3$ )  $\delta$  7.33-7.28 (m, 1H, ArH), 7.23-7.16 (m, 1H, ArH), 7.16-7.00 (m, 1H, ArH), 4.97 (q,  $J=6.4$  Hz, 1H, CH), 1.86 (s, 1H, OH), 1.52 (d,  $J=6.4$  Hz, 3H,  $\text{CH}_3$ ).

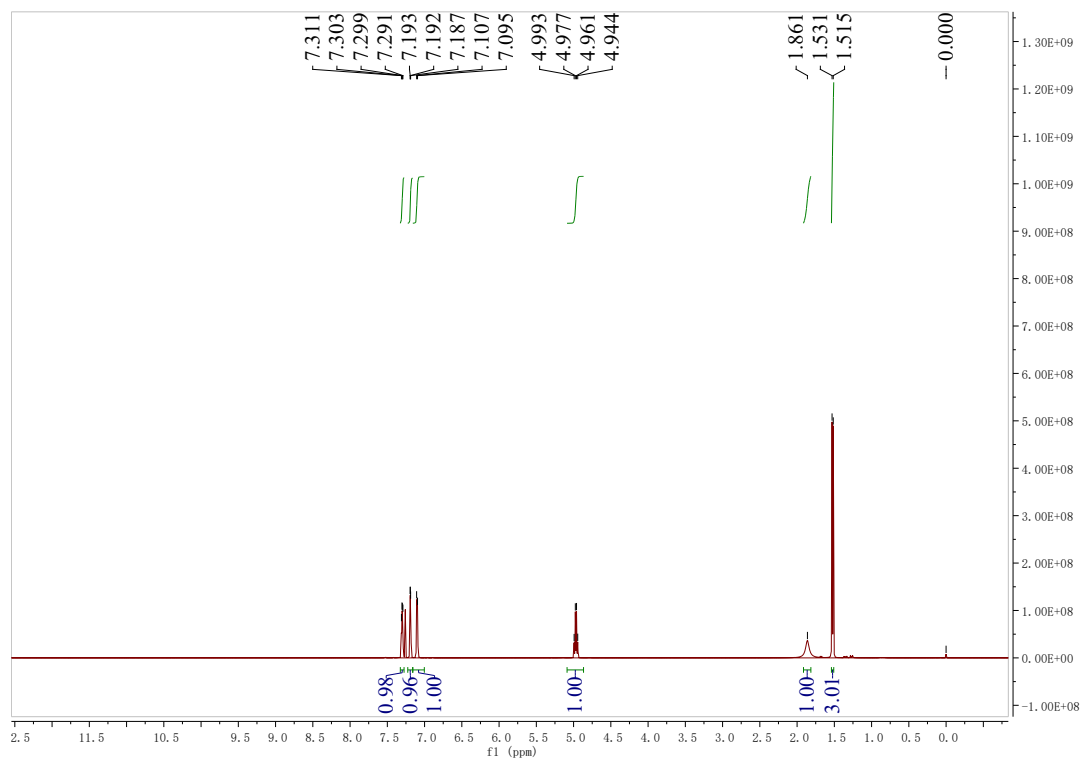

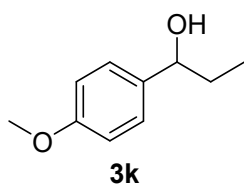

$^1\text{H}$  NMR (400 MHz,  $\text{CDCl}_3$ )  $\delta$  7.27-7.25 (m, 2H, ArH), 6.90-6.86 (m, 2H, ArH), 4.54 (t,  $J = 6.8$  Hz, 1H, CH), 3.80 (s, 3H,  $\text{OCH}_3$ ), 1.84-1.66 (m, 2H,  $\text{CH}_2$ ), 1.26 (s, 1H), 0.89 (t,  $J = 8.0$  Hz, 3H).

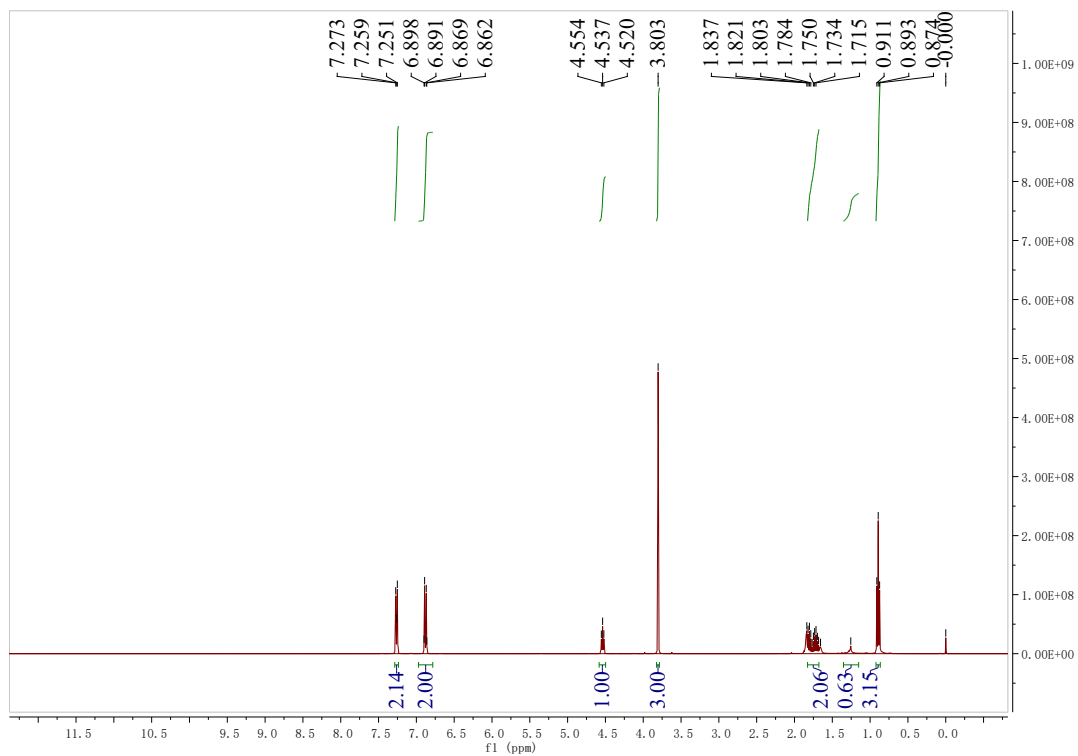



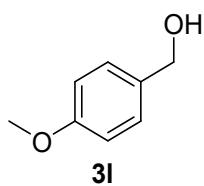

$^1\text{H}$  NMR (400 MHz,  $\text{CDCl}_3$ )  $\delta$  7.34-7.26 (m, 2H, ArH), 6.94-6.86 (m, 2H, ArH), 4.61 (s, 1H,  $\text{CH}_2$ ), 3.81 (s, 3H,  $\text{CH}_3$ ), 1.71-1.63 (m, 1H, OH).

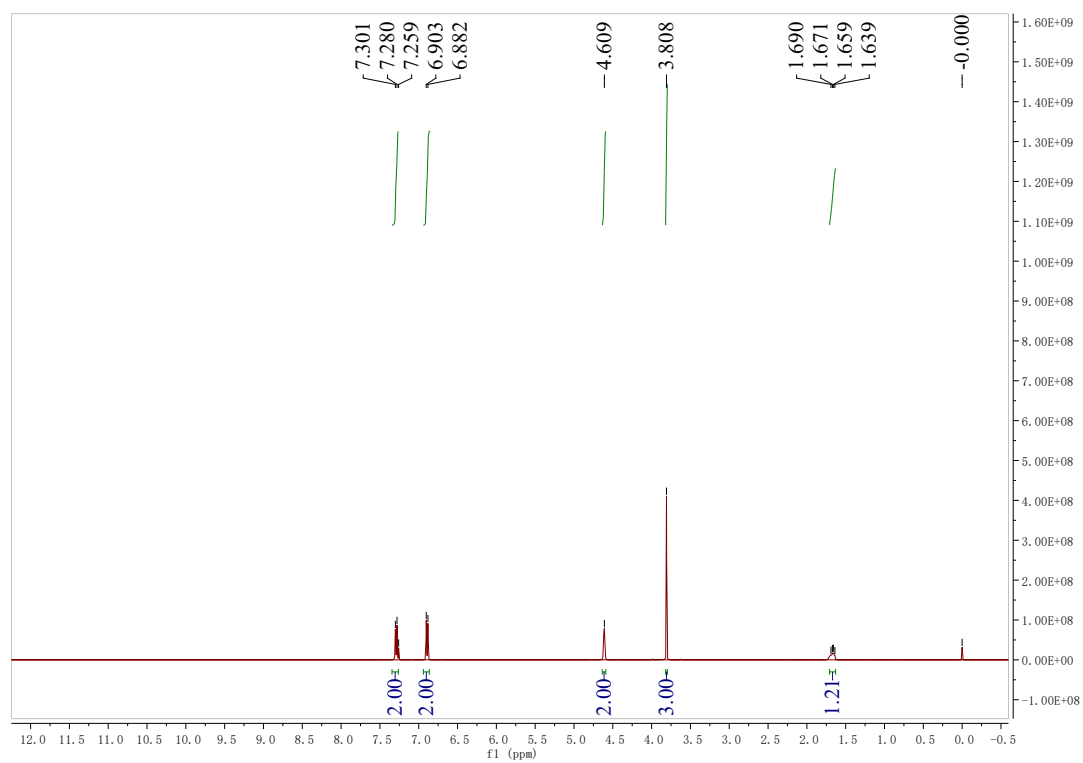

**HPLC trace** (Absolute configuration confirmed by comparison with literature values)<sup>1</sup>

**3a**, HPLC analysis using a Chiralcel OD-H column. (HPLC: OD-H, 220 nm, *n*-hexane/isopropanol = 95:5, flow rate 1 mL/min)

***Rac*-3a**

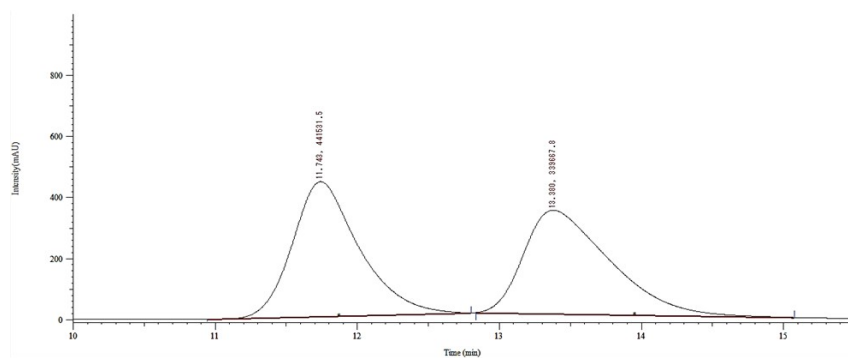

| Peak | RT/min | Area       | Area/% |
|------|--------|------------|--------|
| 1    | 11.743 | 14409349.6 | 50.304 |
| 2    | 13.380 | 14235240.9 | 49.696 |

***(S)*-3a**

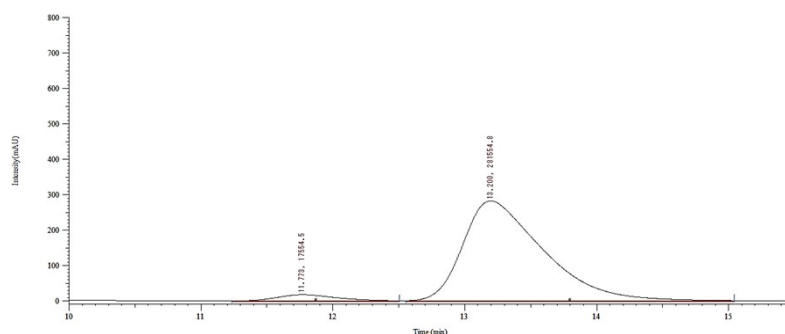

| Peak | RT/min | Area       | Area/% |
|------|--------|------------|--------|
| 1    | 11.773 | 538799.7   | 4.359  |
| 2    | 13.200 | 11821725.1 | 95.641 |

**(R)-3a**

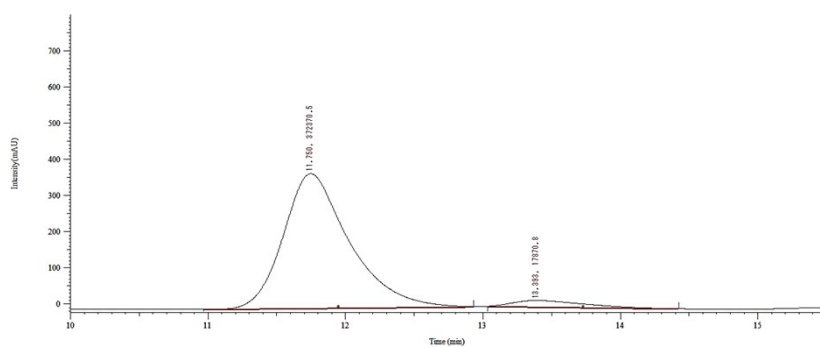

| Peak | RT/min | Area       | Area/% |
|------|--------|------------|--------|
| 1    | 11.750 | 12417723.1 | 95.129 |
| 2    | 13.393 | 635771.6   | 4.871  |

**3b**, HPLC analysis using a Chiralcel OD-H column. (HPLC: OD-H, 220 nm, *n*-hexane/isopropanol = 95:5, flow rate 1 mL/min)

***Rac*-3b**

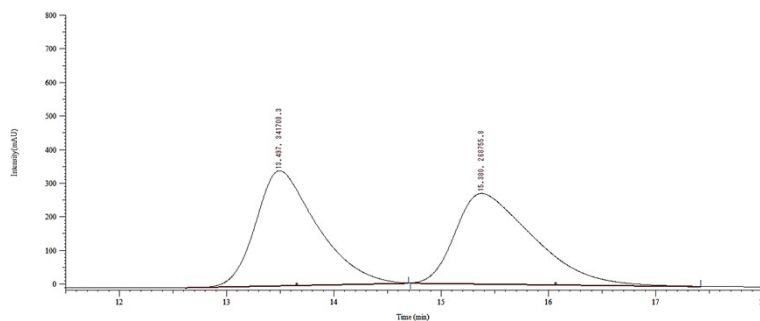

| Peak | RT/min | Area       | Area/% |
|------|--------|------------|--------|
| 1    | 13.497 | 13559822.7 | 50.208 |
| 2    | 15.380 | 13447510.9 | 49.792 |

***(S)*-3b**

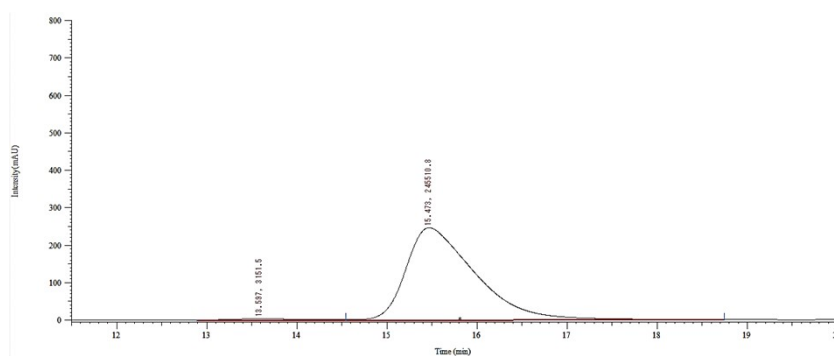

| Peak | RT/min | Area       | Area/% |
|------|--------|------------|--------|
| 1    | 13.597 | 126552.5   | 0.969  |
| 2    | 15.473 | 12939431.1 | 99.031 |

**(R)-3b**

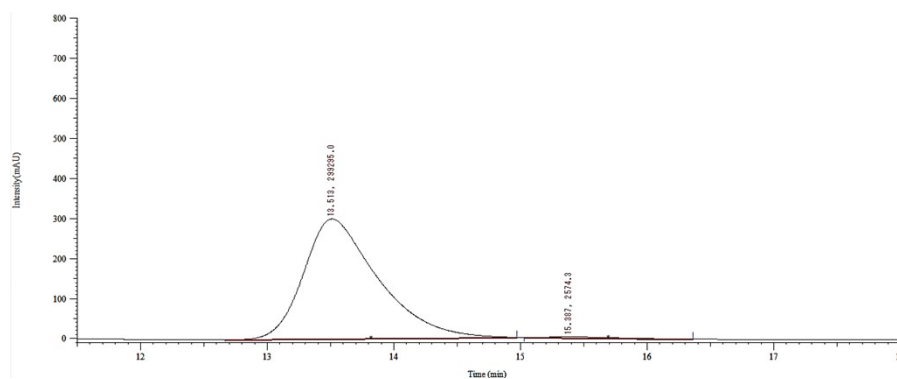

| Peak | RT/min | Area       | Area/% |
|------|--------|------------|--------|
| 1    | 13.513 | 12191946.6 | 99.232 |
| 2    | 15.387 | 94367.0    | 0.768  |

**3c**, HPLC analysis using a Chiralcel OD-H column. (HPLC: OD-H, 220 nm, *n*-hexane/isopropanol = 99:1, flow rate 1 mL/min)

***Rac*-3c**

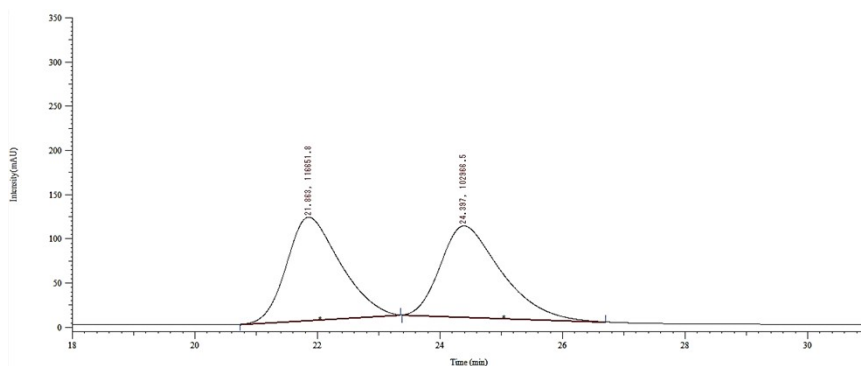

| Peak | RT/min | Area      | Area/% |
|------|--------|-----------|--------|
| 1    | 21.863 | 7068579.1 | 50.005 |
| 2    | 24.397 | 7067067.0 | 49.995 |

***(R)*-3c**

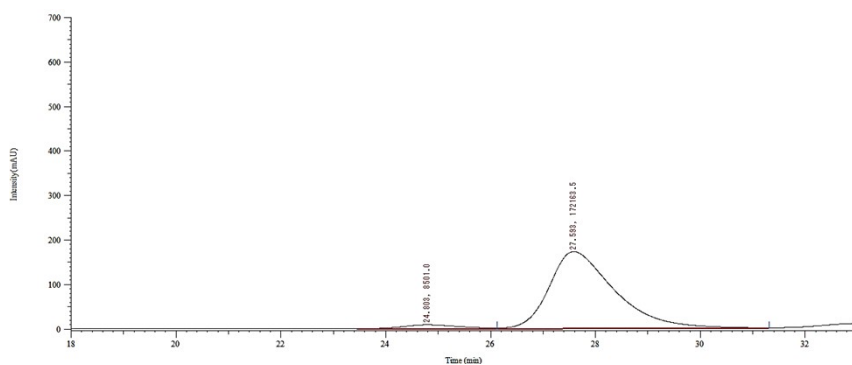

| Peak | RT/min | Area       | Area/% |
|------|--------|------------|--------|
| 1    | 24.803 | 604014.7   | 3.934  |
| 2    | 27.593 | 14750297.1 | 96.066 |

**3d**, HPLC analysis using a Chiralcel OD-H column. (HPLC: OD-H, 220 nm, *n*-hexane/isopropanol = 99:1, flow rate 1 mL/min)

***Rac*-3d**

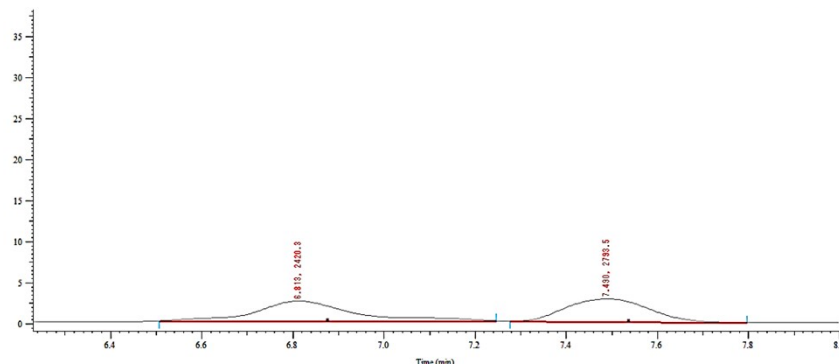

| Peak | RT/min | Area    | Area/% |
|------|--------|---------|--------|
| 1    | 6.813  | 35391.4 | 50.042 |
| 2    | 7.490  | 35331.4 | 49.958 |

***(R)*-3d**

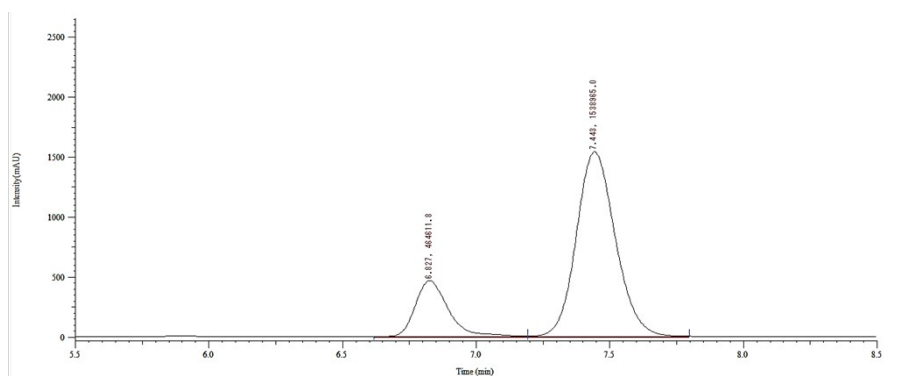

| Peak | RT/min | Area       | Area/% |
|------|--------|------------|--------|
| 1    | 6.827  | 3991154.2  | 20.310 |
| 2    | 7.443  | 15659781.1 | 79.690 |

**3e**, HPLC analysis using a Chiralcel AD-H column (HPLC: AD-H, 220 nm, *n*-hexane/isopropanol = 90:10, flow rate 1 mL/min)

***Rac*-3e**

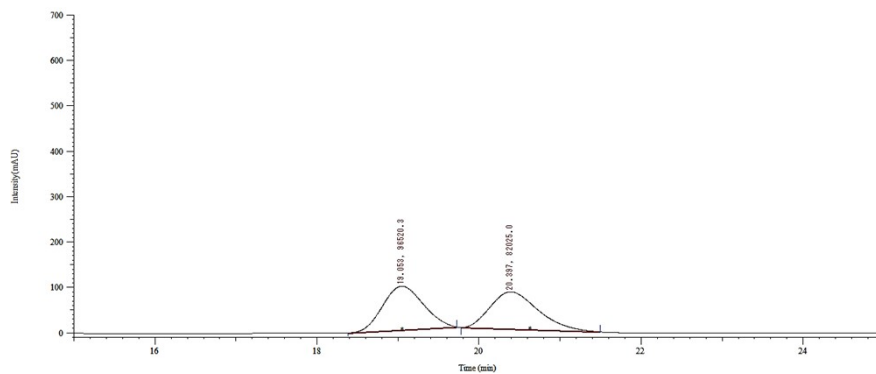

| Peak | RT/min | Area    | Area/% |
|------|--------|---------|--------|
| 1    | 19.053 | 3353296 | 49.930 |
| 2    | 20.397 | 3362719 | 50.070 |

***(S)*-3e**

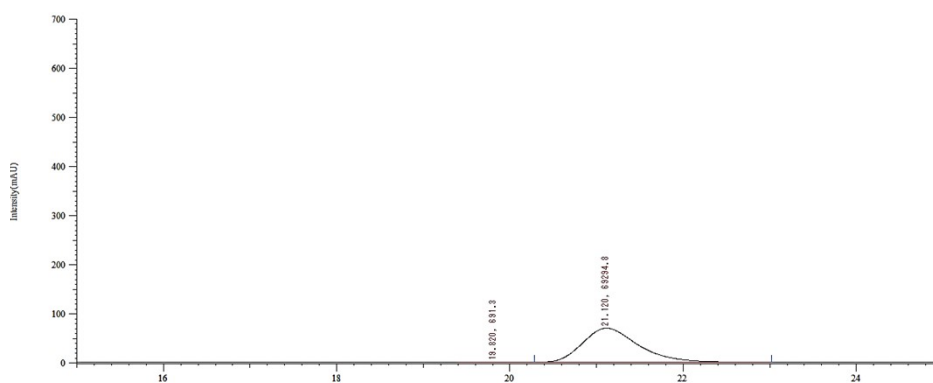

| Peak | RT/min | Area    | Area/% |
|------|--------|---------|--------|
| 1    | 19.820 | 18224   | 0.585  |
| 2    | 21.120 | 3098047 | 99.415 |

***(R)*-3e**



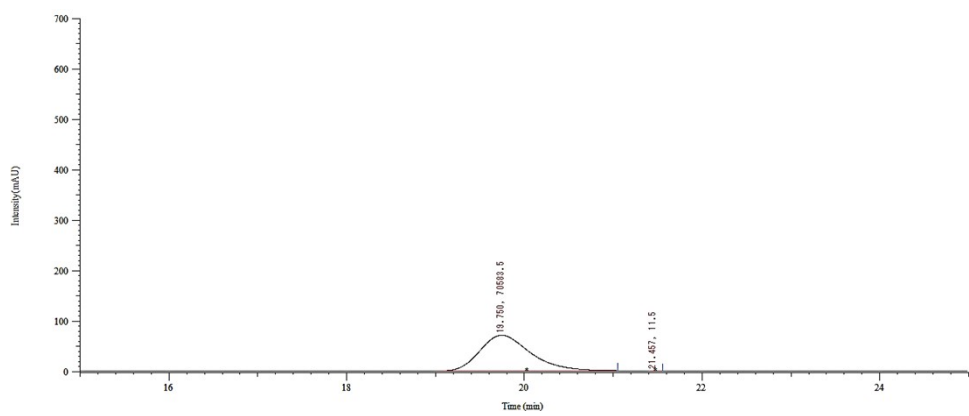

| Peak | RT/min | Area    | Area/% |
|------|--------|---------|--------|
| 1    | 19.750 | 2784074 | 99.998 |
| 2    | 21.543 | 158     | 0.002  |

**3f**, HPLC analysis using a Chiralcel OD-H column, (HPLC: OD-H, 220 nm, *n*-hexane/isopropanol = 99:1, flow rate 1 mL/min)

***Rac*-3f**

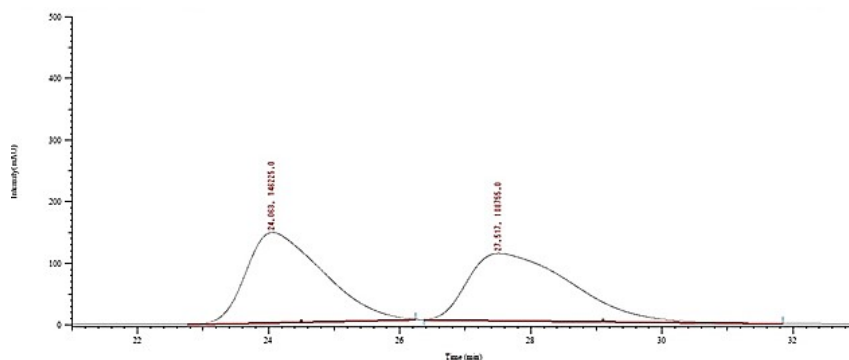

| Peak | RT/min | Area       | Area/% |
|------|--------|------------|--------|
| 1    | 24.063 | 11824582.8 | 50.067 |
| 2    | 27.517 | 11793034.8 | 49.933 |

***(S)*-3f**

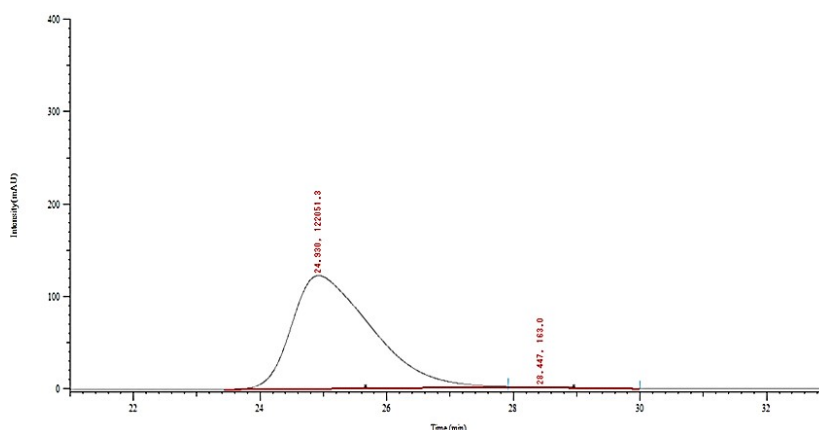

| Peak | RT/min | Area       | Area/% |
|------|--------|------------|--------|
| 1    | 24.930 | 10561947.2 | 99.932 |
| 2    | 28.447 | 7154.2     | 0.068  |

***(R)*-3f**

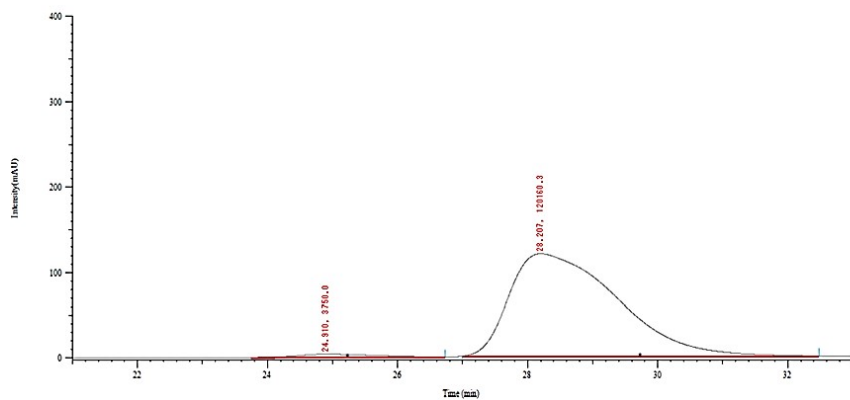

| Peak | RT/min | Area       | Area/% |
|------|--------|------------|--------|
| 1    | 24.910 | 292422.1   | 2.076  |
| 2    | 28.207 | 13793305.3 | 97.924 |

**3g**, HPLC analysis using a Chiralcel OD-H column (HPLC: OJ-H, 220 nm, *n*-hexane/isopropanol = 97:3)

***Rac*-3g**

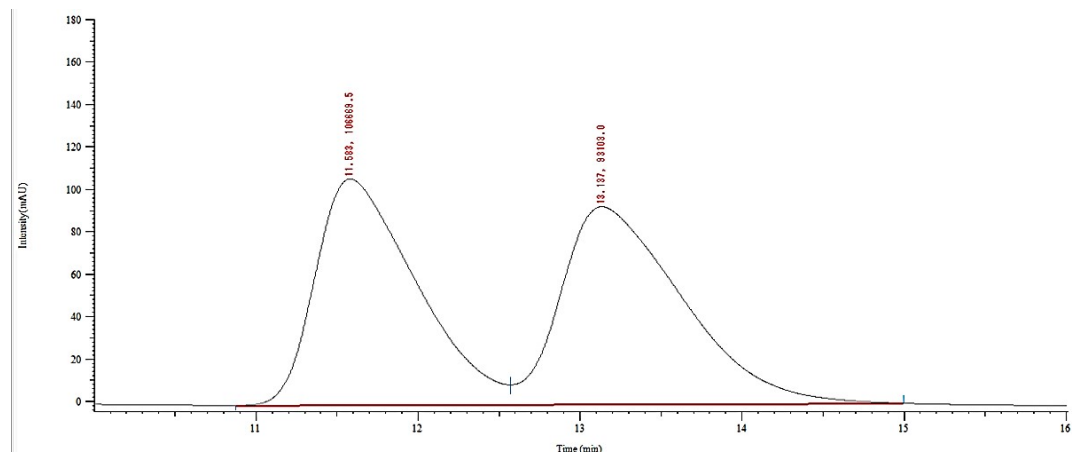

| Peak | RT/min | Area      | Area/% |
|------|--------|-----------|--------|
| 1    | 11.583 | 4545175.5 | 49.799 |
| 2    | 13.137 | 4581924.1 | 50.201 |

***(R)*-3g**

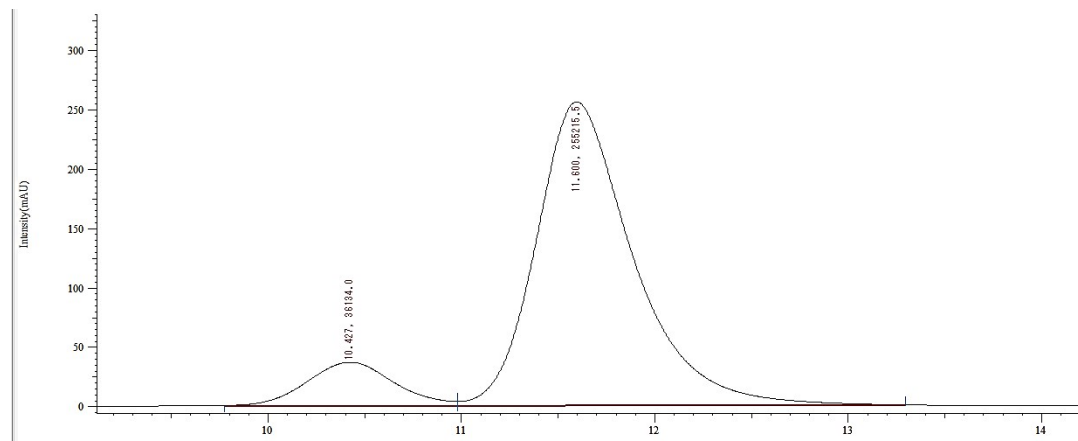

| Peak | RT/min | Area      | Area/% |
|------|--------|-----------|--------|
| 1    | 10.427 | 1117088.1 | 11.146 |
| 2    | 11.600 | 8905457.7 | 88.854 |

**3h**, HPLC analysis using a Chiralcel OJ-H column, (HPLC: OJ-H, 220 nm, *n*-hexane/isopropanol = 90:10, flow rate 1 mL/min)

***Rac*-3h**

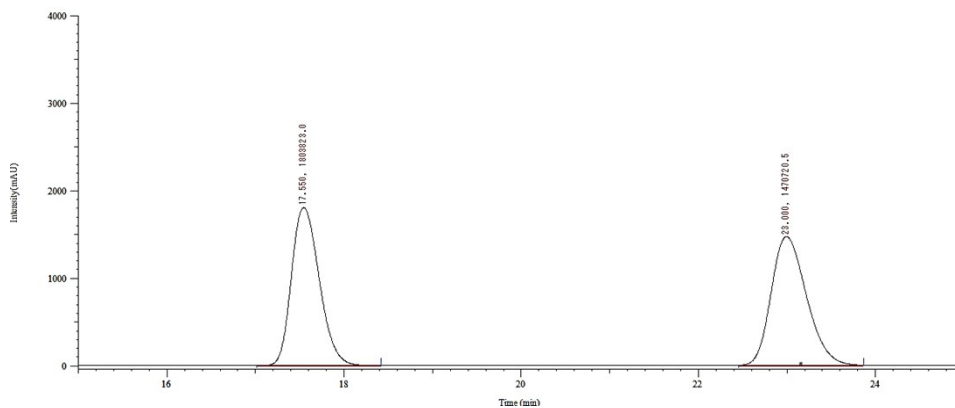

| Peak | RT/min | Area     | Area/% |
|------|--------|----------|--------|
| 1    | 17.550 | 39394692 | 49.165 |
| 2    | 23.000 | 40732411 | 50.835 |

***(S)*-3h**

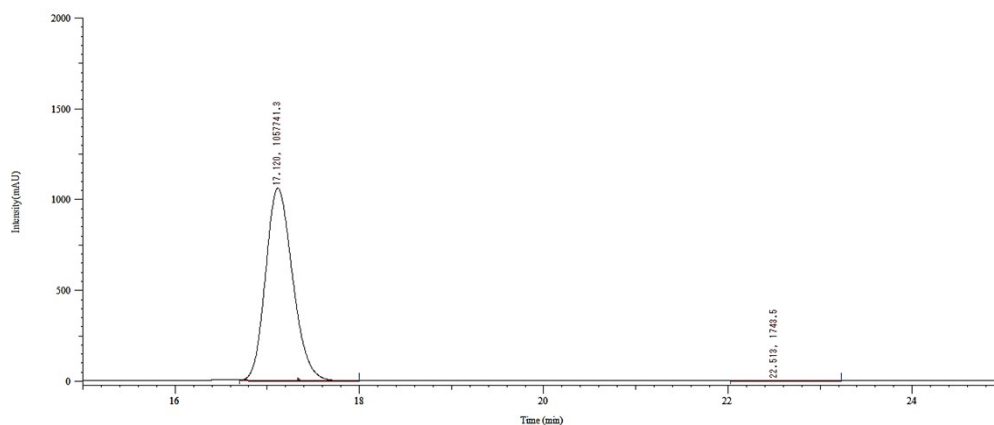

| Peak | RT/min | Area     | Area/% |
|------|--------|----------|--------|
| 1    | 17.120 | 21503870 | 99.794 |
| 2    | 22.513 | 44295    | 0.206  |

**(R)-3h**

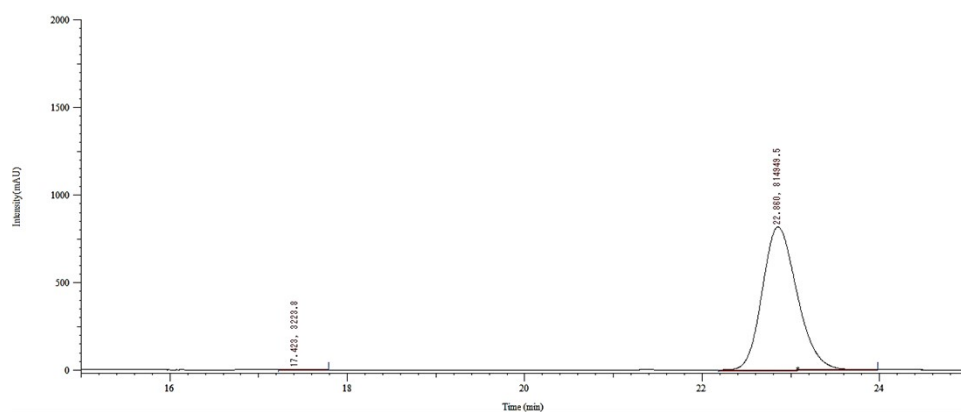

| Peak | RT/min | Area     | Area/% |
|------|--------|----------|--------|
| 1    | 17.423 | 59362    | 0.268  |
| 2    | 22.860 | 22086474 | 99.732 |

**3i**, HPLC analysis using a Chiralcel OJ-H column (HPLC: OJ-H, 220 nm, *n*-hexane/isopropanol = 95:5, flow rate 1 mL/min)

***Rac*-3i**

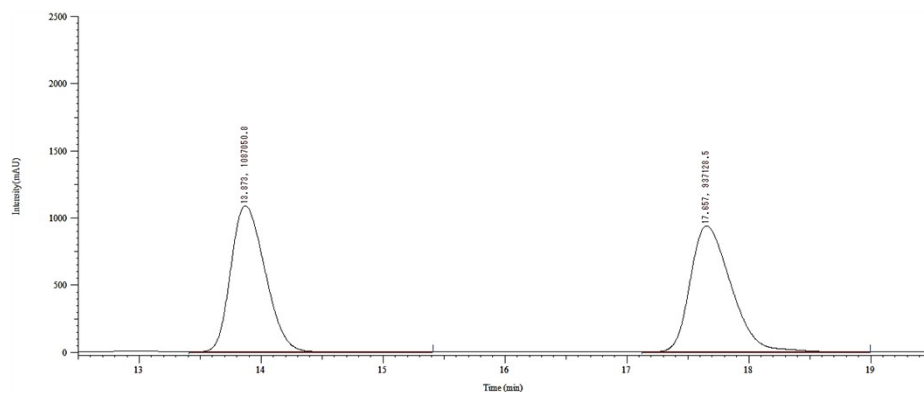

| Peak | RT/min | Area       | Area/% |
|------|--------|------------|--------|
| 1    | 13.873 | 21202334.3 | 49.375 |
| 2    | 17.657 | 21738819.4 | 50.625 |

***(S)*-3i**

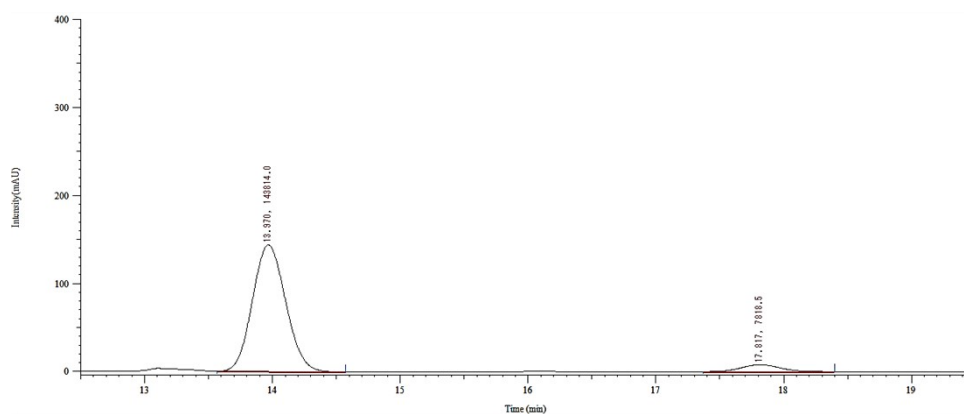

| Peak | RT/min | Area      | Area/% |
|------|--------|-----------|--------|
| 1    | 13.970 | 2601458.9 | 94.973 |
| 2    | 17.817 | 151187.2  | 5.027  |

**(R)-3i**

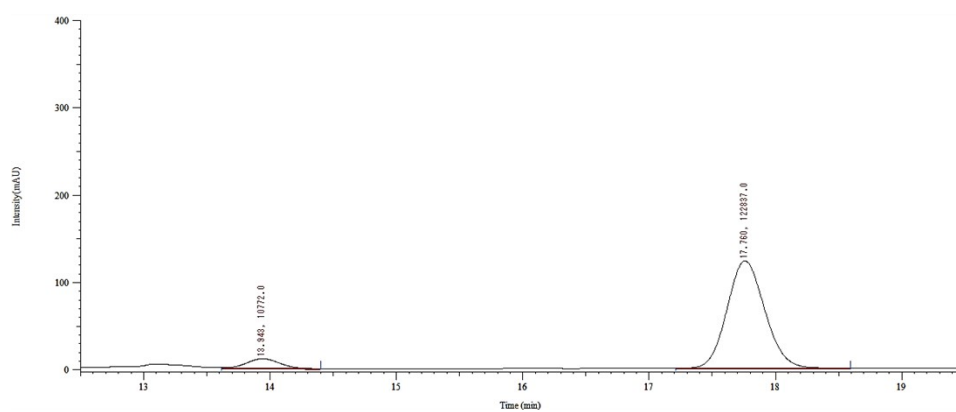

| Peak | RT/min | Area      | Area/% |
|------|--------|-----------|--------|
| 1    | 13.943 | 187348.7  | 6.858  |
| 2    | 17.760 | 2544631.9 | 93.142 |



**3j**, HPLC analysis using a Chiralcel OJ-H column (HPLC: OJ-H, 220 nm, *n*-hexane/isopropanol = 95:5, flow rate 1 mL/min)

***Rac*-3j**

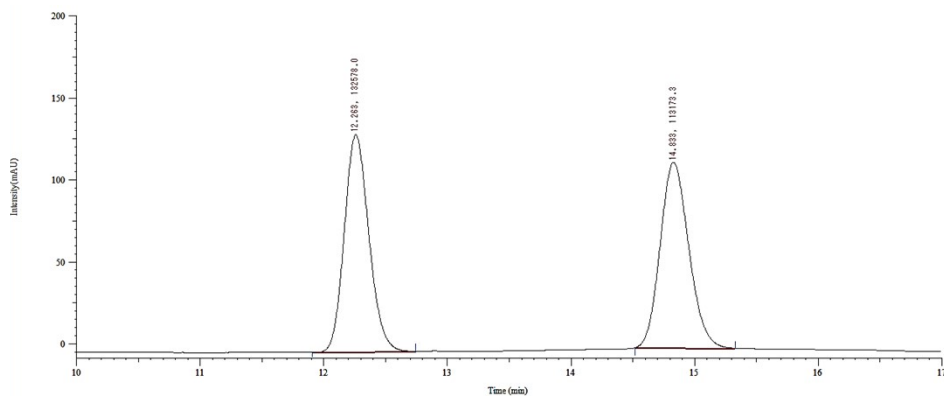

| Peak | RT/min | Area    | Area/% |
|------|--------|---------|--------|
| 1    | 12.263 | 1832259 | 50.105 |
| 2    | 14.833 | 1824587 | 49.895 |

***(S)*-3j**

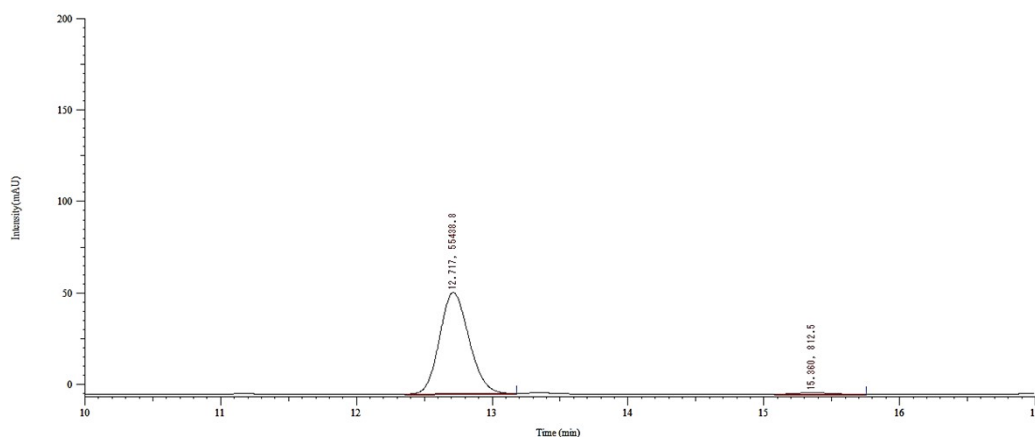

| Peak | RT/min | Area   | Area/% |
|------|--------|--------|--------|
| 1    | 12.717 | 831912 | 98.469 |
| 2    | 15.360 | 12931  | 1.531  |

***(R)*-3j**

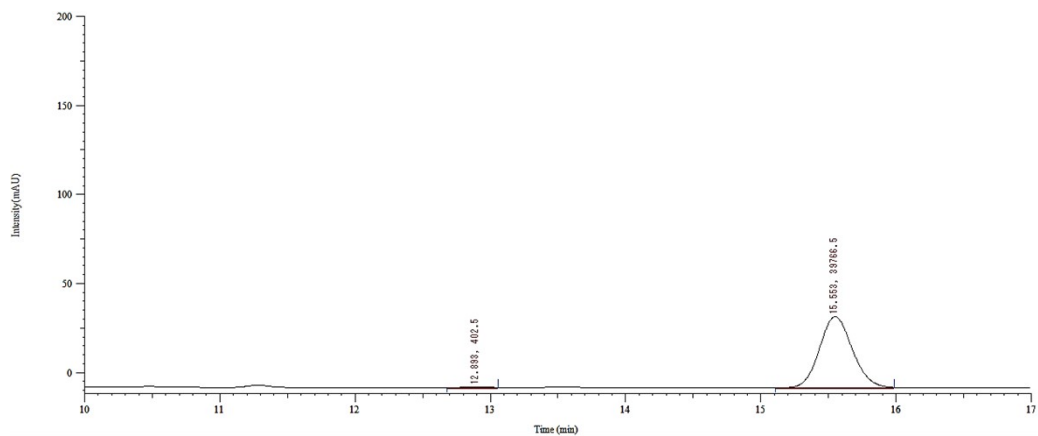

| Peak | RT/min | Area   | Area/% |
|------|--------|--------|--------|
| 1    | 12.893 | 5322   | 0.782  |
| 2    | 15.553 | 675211 | 99.218 |

**3k**, HPLC analysis using a Chiralcel OD-H column (HPLC: OD-H, 220 nm, *n*-hexane/isopropanol = 95:5, flow rate 1 mL/min)

***Rac*-3k**

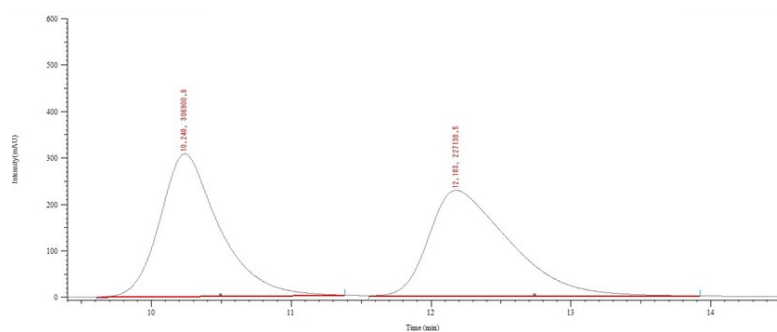

| Peak | RT/min | Area      | Area/% |
|------|--------|-----------|--------|
| 1    | 10.240 | 9031933.6 | 49.994 |
| 2    | 12.183 | 9034193.1 | 50.006 |

***(S)*-3k**

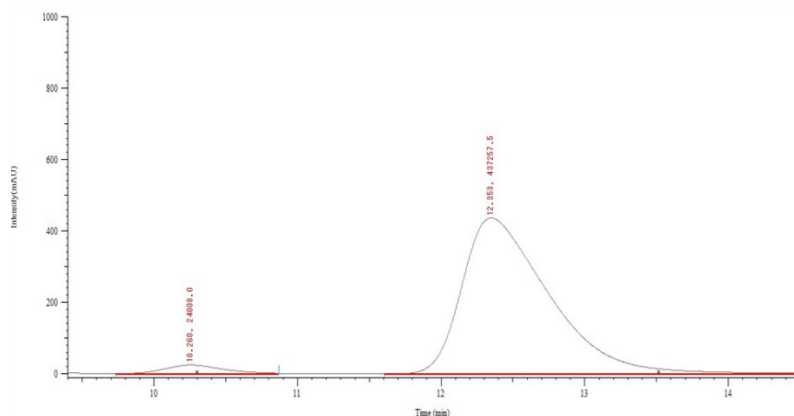

| Peak | RT/min | Area       | Area/% |
|------|--------|------------|--------|
| 1    | 10.260 | 655162.9   | 3.432  |
| 2    | 12.353 | 18432379.3 | 96.568 |

**(R)-3k**

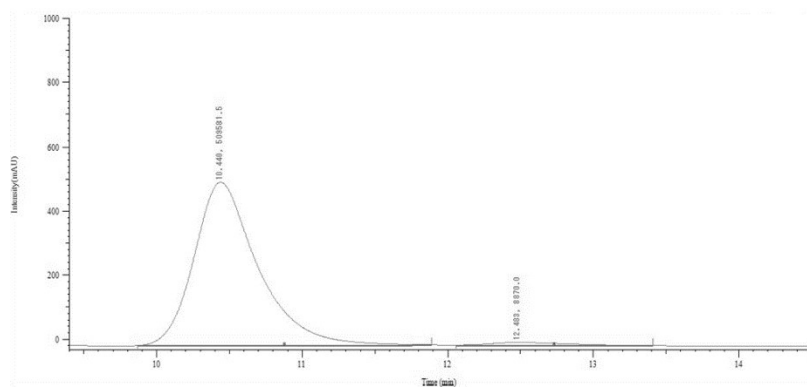

| Peak | RT/min | Area       | Area/% |
|------|--------|------------|--------|
| 1    | 10.440 | 15528959.3 | 98.020 |
| 2    | 12.483 | 313758.0   | 1.980  |

**2h**, HPLC analysis using a Chiralcel OJ-H column (HPLC: OJ-H, 220 nm, *n*-hexane/isopropanol = 90:10, flow rate 1 mL/min)

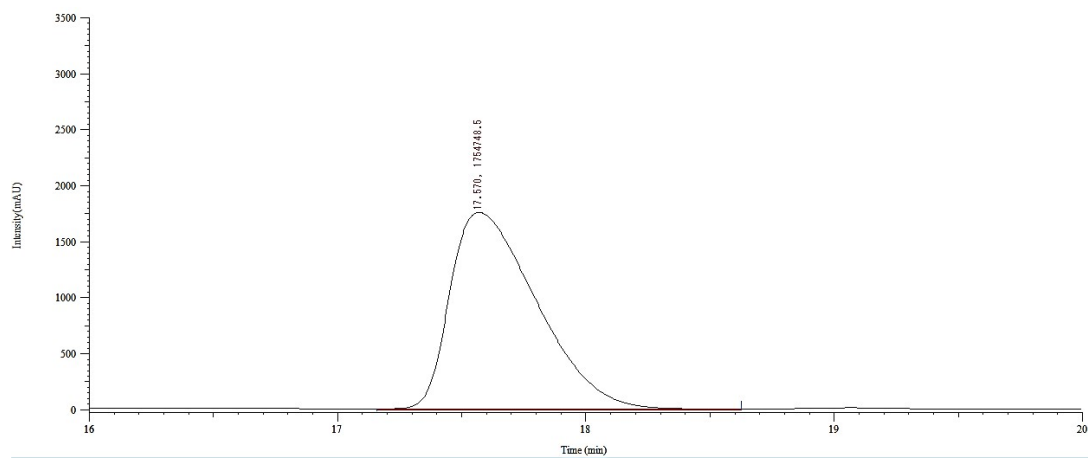

| Peak | RT/min | Area       | Area/% |
|------|--------|------------|--------|
| 1    | 17.560 | 37894036.2 | 100    |

*Rac-3a* as substrate, HPLC analysis using a Chiralcel OD-H column (HPLC: OD-H, 220 nm, *n*-hexane/isopropanol = 95:5, flow rate 1 mL/min).

***Rac-3a***

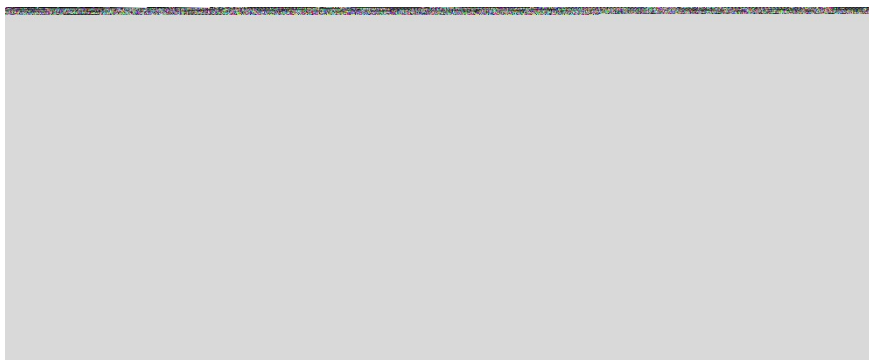

| Peak | RT/min | Area       | Area/% |
|------|--------|------------|--------|
| 1    | 11.743 | 14409349.6 | 50.304 |
| 2    | 13.380 | 14235240.9 | 49.696 |

***(S)-3a***

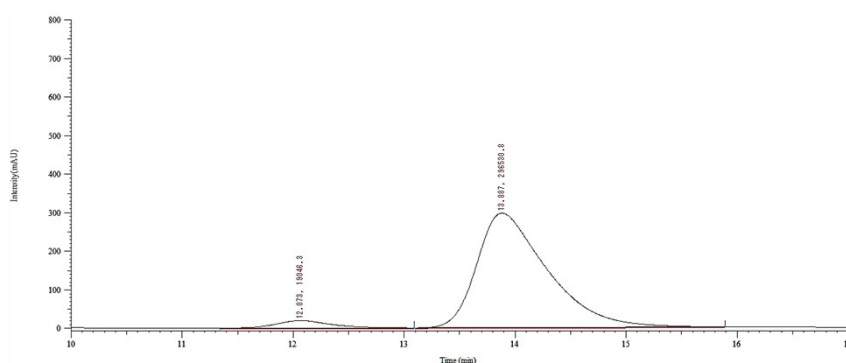

| Peak | RT/min | Area       | Area/% |
|------|--------|------------|--------|
| 1    | 12.073 | 640389.4   | 4.679  |
| 2    | 13.887 | 13045612.9 | 95.321 |

**(R)-3a**

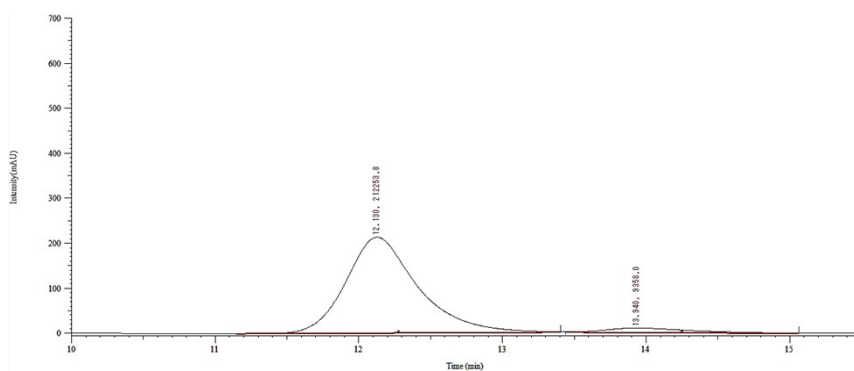

| Peak | RT/min | Area      | Area/% |
|------|--------|-----------|--------|
| 1    | 12.130 | 7318188.7 | 95.409 |
| 2    | 13.940 | 352144.1  | 4.591  |

Spectral data for the enzymatic products

(S)-3a

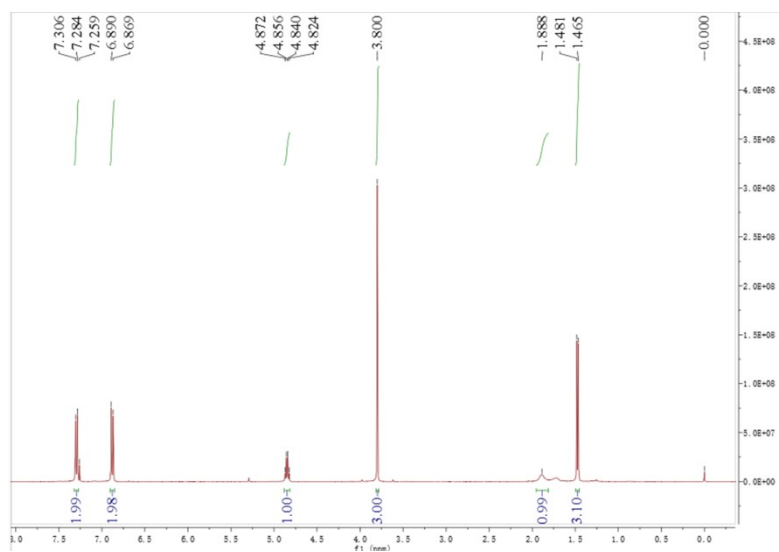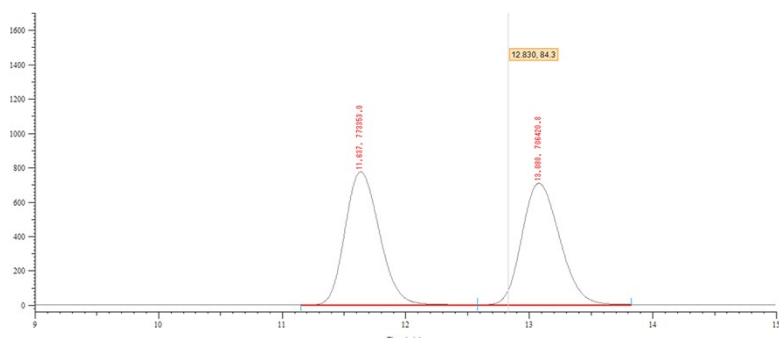

| Peak | RT/min | Area       | Area/% |
|------|--------|------------|--------|
| 1    | 11.637 | 14942332.3 | 49.937 |
| 2    | 13.080 | 14979756.3 | 50.063 |

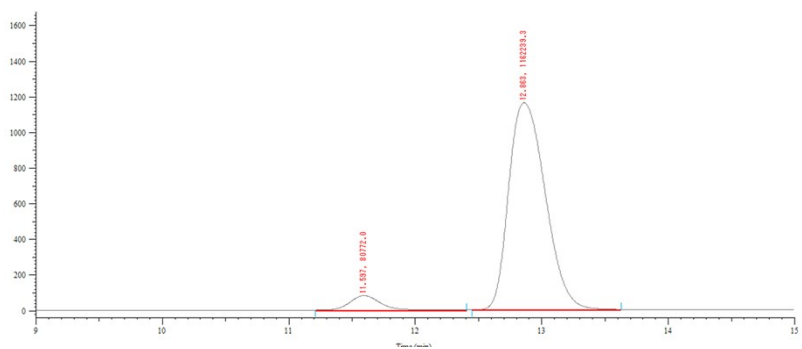

| Peak | RT/min | Area       | Area/% |
|------|--------|------------|--------|
| 1    | 11.597 | 1302062.2  | 5.261  |
| 2    | 12.863 | 23403523.0 | 94.729 |



(R)-3a

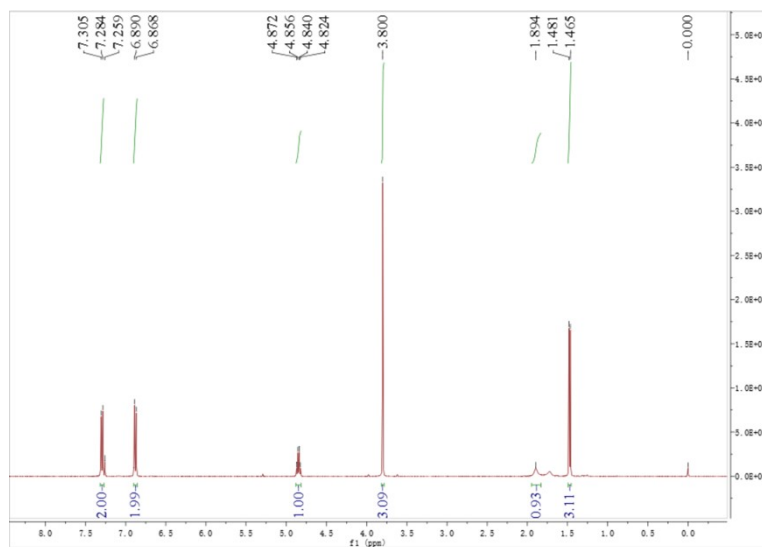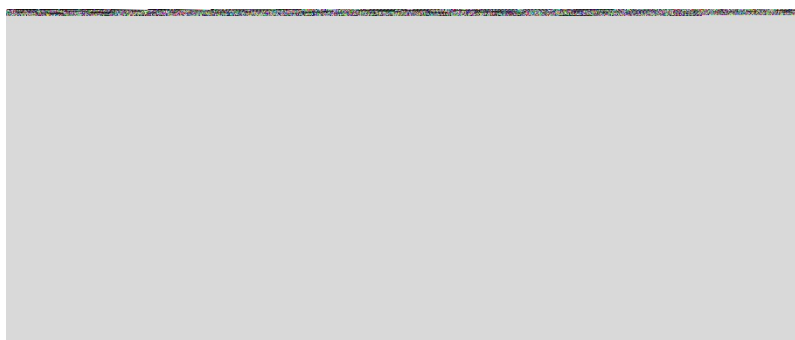

| Peak | RT/min | Area       | Area/% |
|------|--------|------------|--------|
| 1    | 11.637 | 14942332.3 | 49.937 |
| 2    | 13.080 | 14979756.3 | 50.063 |

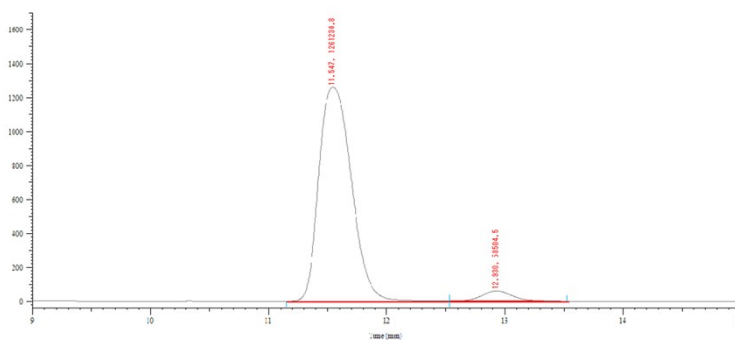

| Peak | RT/min | Area       | Area/% |
|------|--------|------------|--------|
| 1    | 11.547 | 24214722.7 | 95.907 |
| 2    | 12.930 | 1033479.6  | 5.493  |

1. Niu, L.-X. Liu, B. Wu, and Y.-Zhou, *J. Org. Chem.* 2023, **88**, 7863–7871
